# Supplementary material for: Age-Specific Signatures of Glioblastoma at the Genomic, Genetic, and Epigenetic Levels
Source: PLoS One. 2013 Apr 29;8(4):e62982. doi: 10.1371/journal.pone.0062982 (PMC3639162; doi:10.1371/journal.pone.0062982)
Supplement: Table S1 — Survival analysis of GBM in randomized phase trials. (XLS) [file pone.0062982.s004.xls]

## Sheet: Sup Table 1
Supplementary Table 1. Survival analysis of GBM in randomized phase trials.
Study	# patients	Findings
3 phase III randomized RTOG trials (7401, 7918, and 8302)	644	14-39 yo (n=76): median survival of 16.2 months
GBM only (16)		40-59 yo (n=330): median survival of 11.1 months
		60-74 yo (n=238): median survival of 7.5 months
Meta-analysis of 12 randomized trials comparing RT with RT+chemotherapy	3004	£ 40 yo: 2-year survival of 50% (RT only, n=218) and 55% (RT+ chemotherapy, n=218)
GBM (63%) + anaplastic astrocytoma (24%) (19)		41-59 yo: 2-year survival of 14% (RT only, n=714); 19% (RT+chemotherapy, n=914)
		³ 60 years: 2-year survival of 4% (RT only, n=362) and 6% (RT+ chemotherapy, n=474)
CNS Cancer Consortium Phase III trial of RT, mitomycin C, BCNU, and 6-mercaptopurine	327	< 45 years (n=90): median survival = 24 months, 2-year survival=51%
GBM (69%) + anaplastic astrocytoma (25%) (18)		³ 45 years (n=237): median survival = 8.8 months, 2-year survival=9%
Phase III trial of RT plus either BCNU+cisplatin or BCNU for newly diagnosed GBM (17)	401	< 40 (n=35): HR=1
		40 to < 60 (n= 229): HR=1.33
		³ 60 years (n= 137): HR=2.35 P <0.0001 on a multivariate analysis.
Phase III trial of RT +/- temozolomide (EORTC/NCIC) for newly diagnosed GBM(63)	573	£ 50 yo: median survival of 13.6 months (RT alone, n=88) and 17.4 months (RT+temozolomide, n=95)
		51-60 yo: median survival of 12 months (RT alone, n=111) and 14.6 months (RT+temozolomide, n=109)
		> 60 yo: median survival of 11.8 (RT alone, n=87) and
		11.3 months (RT+ temozolomide, n=83)
