# Supplementary material for: Age-Specific Signatures of Glioblastoma at the Genomic, Genetic, and Epigenetic Levels
Source: PLoS One. 2013 Apr 29;8(4):e62982. doi: 10.1371/journal.pone.0062982 (PMC3639162; doi:10.1371/journal.pone.0062982)
Supplement: Table S3 — Cox multivariate analysis results for survival. P-values≤0.05 are bold faced. (XLSX) [file pone.0062982.s006.xlsx]

## Sheet: Sup Table 3
Supplementary Table 3. Cox multivariate analysis results for survival. P-values ≤ 0.05 are bold faced.
Variable	P-value
Age	5.052e-07
Gender	0.519498
Molecular subtype	0.49433
Karnofsky Performance Score	0.0003705
