# Supplementary material for: Age-Specific Signatures of Glioblastoma at the Genomic, Genetic, and Epigenetic Levels
Source: PLoS One. 2013 Apr 29;8(4):e62982. doi: 10.1371/journal.pone.0062982 (PMC3639162; doi:10.1371/journal.pone.0062982)
Supplement: Table S4 — List of differentially expressed genes found by standard linear regression (FDR≤0.05). (XLSX) [file pone.0062982.s007.xlsx]

## Sheet: Sup Table 4
Supplementary Table 4. List of differentially expressed genes found by standard linear regression (FDR < 0.05).
Affymetrix HT HG U133A			Agilent 244K G4502A			Affymetrix Human Exon 1.0 ST
Gene Symbol	Entrez ID	Expression stat in Old	Gene Symbol	Entrez ID	Expression stat in Old	Gene Symbol	Entrez ID	Expression stat in Old
AAGAB	79719	DOWN	AKR1CL2	83592	DOWN	CBARA1	10367	DOWN
ABCC9	10060	DOWN	ALDH1A3	220	DOWN	ADCY2	108	DOWN
ABHD2	11057	DOWN	ALS2CR11	151254	DOWN	DBC1	1620	DOWN
ABI1	10006	DOWN	AMOTL1	154810	DOWN	ALDH1A3	220	DOWN
ACAA2	10449	DOWN	ARHGAP12	94134	DOWN	FBN2	2201	DOWN
ACOT9	23597	DOWN	ARPM1	84517	DOWN	COTL1	23406	DOWN
ACP5	54	DOWN	ART5	116969	DOWN	MGC87042	256227	DOWN
ACTR1A	10121	DOWN	ASAM	79827	DOWN	CACNG5	27091	DOWN
ADA	100	DOWN	ATF7IP2	80063	DOWN	PCSK1N	27344	DOWN
ADAM10	102	DOWN	ATP11B	23200	DOWN	GLUD2	2747	DOWN
ADK	132	DOWN	ATP5C1	509	DOWN	HHEX	3087	DOWN
ADORA2B	136	DOWN	BFSP1	631	DOWN	LTBR	4055	DOWN
ADRBK1	156	DOWN	BMP5	653	DOWN	MYO1B	4430	DOWN
ADRBK2	157	DOWN	BUB3	9184	DOWN	NDN	4692	DOWN
ADSL	158	DOWN	C10orf12	26148	DOWN	NPTX2	4885	DOWN
AFTPH	54812	DOWN	C10orf125	282969	DOWN	H2AFY2	55506	DOWN
AICDA	57379	DOWN	C10orf46	143384	DOWN	ENOSF1	55556	DOWN
AIM1	202	DOWN	C10orf47	254427	DOWN	NRIP3	56675	DOWN
AIP	9049	DOWN	C12orf4	57102	DOWN	SFRP1	6422	DOWN
AIRE	326	DOWN	C12orf56	115749	DOWN	RANBP17	64901	DOWN
AKAP2 /// PALM2-AKAP2	11217	DOWN	C14orf169	79697	DOWN	SVIL	6840	DOWN
ALDH18A1	5832	DOWN	C16orf73	254528	DOWN	VRK2	7444	DOWN
ALDH1A3	220	DOWN	C1orf59	113802	DOWN	TMEM185B	79134	DOWN
ALOX12P2	245	DOWN	C2	717	DOWN	GALNT14	79623	DOWN
AMDHD2	51005	DOWN	C21orf105	90625	DOWN	C14orf169	79697	DOWN
AMMECR1	9949	DOWN	C21orf109	193629	DOWN	TUSC3	7991	DOWN
ANKRD26	22852	DOWN	C22orf13	83606	DOWN	ATF7IP2	80063	DOWN
ANKRD5	63926	DOWN	C4orf32	132720	DOWN	NETO2	81831	DOWN
ANO1	55107	DOWN	C4orf38	152641	DOWN	VANGL1	81839	DOWN
ANXA11	311	DOWN	C6orf150	115004	DOWN	FZD6	8323	DOWN
ANXA3	306	DOWN	C7orf13	129790	DOWN	HIST1H2BM	8342	DOWN
AP1M2	10053	DOWN	C7orf40	285958	DOWN	KLF11	8462	DOWN
AP2S1	1175	DOWN	C8orf85	441376	DOWN	TSPYL5	85453	DOWN
APOL5	80831	DOWN	CABYR	26256	DOWN	DLK1	8788	DOWN
APRT	353	DOWN	CAPN6	827	DOWN	HIST3H2A	92815	DOWN
ARAF	369	DOWN	CCDC6	8030	DOWN	KL	9365	DOWN
ARF6	382	DOWN	CCL28	56477	DOWN	C1orf67	429055	DOWN
ARHGEF16	27237	DOWN	CCR1	1230	DOWN	C1orf59	113802	DOWN
ARHGEF5	7984	DOWN	CCR2	729230	DOWN	KIAA1729	85460	DOWN
ARID3A	1820	DOWN	CD19	930	DOWN	ZNF560	147741	DOWN
ARMC4	55130	DOWN	CD3G	917	DOWN	MGC16291	84856	DOWN
ARNTL2	56938	DOWN	CD96	10225	DOWN	ZNF659	79750	DOWN
ARPC1B	10095	DOWN	CDC123	8872	DOWN	C14orf39	317761	DOWN
ARPC2	10109	DOWN	CENPV	201161	DOWN	CTHRC1	115908	DOWN
ART1	417	DOWN	CERK	64781	DOWN	C1orf176	64789	DOWN
ASB9	140462	DOWN	CHEK2	11200	DOWN	OCIAD2	132299	DOWN
ASGR2	433	DOWN	CLIC6	54102	DOWN	MACROD2	140733	DOWN
ATF7IP2	80063	DOWN	COX15	1355	DOWN	ZNF233	353355	DOWN
ATP1A1	476	DOWN	CREM	1390	DOWN	ZNF642	339559	DOWN
ATP2A3	489	DOWN	CS	1431	DOWN	ZNF229	7772	DOWN
ATP5C1	509	DOWN	CSTF2T	23283	DOWN	TMEM163	81615	DOWN
ATP6V0A2	23545	DOWN	CTBP2	1488	DOWN	ZNF578	147660	DOWN
ATXN3	4287	DOWN	CTHRC1	115908	DOWN	DMRT2	10655	DOWN
AVL9	23080	DOWN	CUL2	8453	DOWN	PRKCB1	5579	DOWN
AVPR2	554	DOWN	CYP26A1	1592	DOWN	TIMM23	100287932	DOWN
B3GNT2	10678	DOWN	DCN	1634	DOWN	USP44	84101	DOWN
B4GALT1	2683	DOWN	DCP2	167227	DOWN	TRAF7	84231	DOWN
B4GALT6	9331	DOWN	DDX43	55510	DOWN	SLC10A4	201780	DOWN
BATF	10538	DOWN	DEM1	64789	DOWN	FLJ44894	664701	DOWN
BAX	581	DOWN	DGKE	8526	DOWN	ZDHHC16	84287
BCL11A	53335	DOWN	DHX32	55760	DOWN	EGLN3	112399	UP
BMP5	653	DOWN	DIO3	1735	DOWN	CYP2U1	113612	UP
BMS1	9790	DOWN	DLK1	8788	DOWN	OSBPL11	114885	UP
BSPRY	54836	DOWN	DLK2	65989	DOWN	PACRG	135138	UP
BUB3	9184	DOWN	DMRT2	10655	DOWN	VCAN	1462	UP
C10orf137	26098	DOWN	DNAH14	127602	DOWN	PRUNE2	158471	UP
C10orf28	27291	DOWN	DNM1L	10059	DOWN	GBE1	2632	UP
C12orf35	55196	DOWN	DOK6	220164	DOWN	HOXA5	3202	UP
C12orf4	57102	DOWN	DSP	1832	DOWN	HOXD10	3236	UP
C14orf105	55195	DOWN	ECD	11319	DOWN	IGFBP5	3488	UP
C14orf169	79697	DOWN	ECHDC3	79746	DOWN	TMEM144	55314	UP
C16orf57	79650	DOWN	EIF2S3	1968	DOWN	PCDHB13	56123	UP
C17orf59	54785	DOWN	EIF5A2	56648	DOWN	PCDHB8	56128	UP
C1orf144	26099	DOWN	ENOSF1	55556	DOWN	SLC14A1	6563	UP
C2	717	DOWN	EXOSC1	51013	DOWN	GRAMD3	65983	UP
C21orf91	54149	DOWN	F2RL1	2150	DOWN	SEMA3B	7869	UP
C2orf47	79568	DOWN	FAM60A	58516	DOWN	PCDHB9	56127	UP
C2orf49	79074	DOWN	FAM83D	81610	DOWN	GALNTL2	117248	UP
C3orf52	79669	DOWN	FAM83H	286077	DOWN	PCDHB10	56126	UP
CALHM2	51063	DOWN	FBLN2	2199	DOWN	FLJ41603	389337	UP
CALM3	808	DOWN	FBN2	2201	DOWN	PCDHB7	56129	UP
CARHSP1	23589	DOWN	FGL1	2267	DOWN	LHFPL4	375323	UP
CASP7	840	DOWN	FHL2	2274	DOWN	PCDHGB2	56103	UP
CAV2	858	DOWN	FLJ35409	400765	DOWN	ADSSL1	122622	UP
CBARA1	10367	DOWN	FLVCR1	28982	DOWN	LOC441054	441054	UP
CBL	867	DOWN	FRG1B	284802	DOWN	SLC47A2	146802	UP
CCDC64	92558	DOWN	FST	10468	DOWN	AQP11	282679	UP
CCDC88C	440193	DOWN	FZD6	8323	DOWN	DHFRL1	200895	UP
CCDC9	26093	DOWN	FZD9	8326	DOWN	C20orf132	140699	UP
CCL22	6367	DOWN	GALNT14	79623	DOWN	ACAD11	84129	UP
CCND3	896	DOWN	GDA	9615	DOWN	CCDC113	29070	UP
CCR6	1235	DOWN	GDF6	392255	DOWN
CCR7	1236	DOWN	GDI2	2665	DOWN
CCR8	1237	DOWN	GPR81	27198	DOWN
CCT5	22948	DOWN	GRAMD1B	57476	DOWN
CCT8L2	150160	DOWN	GTPBP4	23560	DOWN
CD19	930	DOWN	GYLTL1B	120071	DOWN
CD1C	911	DOWN	GYPC	2995	DOWN
CD22	933	DOWN	H2AFJ	55766	DOWN
CD226	10666	DOWN	H2AFY2	55506	DOWN
CD27	939	DOWN	HERC2P4	440362	DOWN
CD3D	915	DOWN	HIST1H2AB	8335	DOWN
CD40	958	DOWN	HIST1H2AG	8969	DOWN
CD48	962	DOWN	HIST1H2AI	8329	DOWN
CD52	1043	DOWN	HIST1H2AJ	8331	DOWN
CD6	923	DOWN	HIST1H2AK	8330	DOWN
CD7	924	DOWN	HIST3H2A	92815	DOWN
CD70	970	DOWN	HOXD12	3238	DOWN
CD79A	973	DOWN	HPRT1	3251	DOWN
CD79B	974	DOWN	HPS1	3257	DOWN
CD84	8832	DOWN	HS3ST3A1	9955	DOWN
CD8B	926	DOWN	HTATIP2	10553	DOWN
CDC123	8872	DOWN	IDE	3416	DOWN
CDC42EP3	10602	DOWN	IGF2	3481	DOWN
CDCP1	64866	DOWN	IRX2	153572	DOWN
CDK1	983	DOWN	ITGA9	3680	DOWN
CDYL	9425	DOWN	JAK3	3718	DOWN
CENPA	1058	DOWN	JARID1A	5927	DOWN
CENPN	55839	DOWN	KIAA2022	340533	DOWN
CEP55	55165	DOWN	KIF5B	3799	DOWN
CEP57	9702	DOWN	KIN	22944	DOWN
CHEK2	11200	DOWN	KL	9365	DOWN
CHP	11261	DOWN	KLF11	8462	DOWN
CHST11	50515	DOWN	KLK2	3817	DOWN
CHST3	9469	DOWN	LAMA1	284217	DOWN
CISD1	55847	DOWN	LOC100129788	100129788	DOWN
CLP1	10978	DOWN	LOC100129794	100129794	DOWN
CNN2	1265	DOWN	LOC100130700	100130700	DOWN
CNNM2	54805	DOWN	LOC100130958	100130958	DOWN
COPS2	9318	DOWN	LOC100131914	100131914	DOWN
COX15	1355	DOWN	LOC100132833	100132833	DOWN
CPB2	1361	DOWN	LOC100270746	100270746	DOWN
CREM	1390	DOWN	LOC126235	126235	DOWN
CRIP1	1396	DOWN	LOC151146	151146	DOWN
CRLF3	51379	DOWN	LOC284542	284542	DOWN
CRYBB1	1414	DOWN	LOC388630	388630	DOWN
CSAG2 /// CSAG3	389903	DOWN	LOC389023	389023	DOWN
CST6	1474	DOWN	LOC389857	389857	DOWN
CSTF2	1478	DOWN	LOC390183	390183	DOWN
CTPS2	56474	DOWN	LOC391777	391777	DOWN
CWF19L1	55280	DOWN	LOC400464	400464	DOWN
CXCR1	3577	DOWN	LOC441550	441550	DOWN
CXCR3	2833	DOWN	LOC728115	728115	DOWN
CXCR6	10663	DOWN	LOC729264	729264	DOWN
CYP1A2	1544	DOWN	LOC729355	729355	DOWN
CYP1B1	1545	DOWN	LOC730102	730102	DOWN
CYP2A13	1553	DOWN	LOC731954	731954	DOWN
CYP7B1	9420	DOWN	LOC84856	84856	DOWN
DAP3	7818	DOWN	LTBR	4055	DOWN
DARS2	55157	DOWN	LUM	4060	DOWN
DBC1	1620	DOWN	LYPD3	27076	DOWN
DBP	1628	DOWN	MACROD2	140733	DOWN
DCLRE1C	64421	DOWN	MAPK1	5594	DOWN
DCTN5	84516	DOWN	MARCH8	220972	DOWN
DDC	1644	DOWN	MASTL	84930	DOWN
DDX18	8886	DOWN	MCTP2	55784	DOWN
DDX19A /// DDX19B	11269	DOWN	MFAP2	4237	DOWN
DDX21	9188	DOWN	MFSD6L	162387	DOWN
DDX50	79009	DOWN	MMP14	4323	DOWN
DENND2D	79961	DOWN	MRPL43	84545	DOWN
DERL1	79139	DOWN	MSC	9242	DOWN
DHX32	55760	DOWN	MSL3	10943	DOWN
DLG3	1741	DOWN	MSL3L2	151507	DOWN
DLK1	8788	DOWN	MSLN	10232	DOWN
DNAJB12	54788	DOWN	MST4	51765	DOWN
DNAJC1	64215	DOWN	MX2	4600	DOWN
DNASE1L2	1775	DOWN	MYO1B	4430	DOWN
DNM1L	10059	DOWN	NDN	4692	DOWN
DOCK9	23348	DOWN	NEFH	4744	DOWN
DSG2	1829	DOWN	NETO2	81831	DOWN
DSP	1832	DOWN	NPTX2	4885	DOWN
DUSP2	1844	DOWN	NRIP3	56675	DOWN
DUSP4	1846	DOWN	NRTN	4902	DOWN
DUSP5	1847	DOWN	NUDT4	11163	DOWN
DYRK2	8445	DOWN	NUDT4P1	440672	DOWN
EBP	10682	DOWN	NUDT5	11164	DOWN
ECD	11319	DOWN	OBFC1	79991	DOWN
ECHDC3	79746	DOWN	OCIAD2	132299	DOWN
ECHS1	1892	DOWN	P2RY10	27334	DOWN
EDC3	80153	DOWN	PABPC4L	132430	DOWN
EGLN2	112398	DOWN	PARVA	55742	DOWN
EIF3A	8661	DOWN	PDCD4	27250	DOWN
EIF3D	8664	DOWN	PDLIM1	9124	DOWN
EIF4B	1975	DOWN	PDLIM4	8572	DOWN
EIF4E2	9470	DOWN	PENK	5179	DOWN
EIF4EBP2	1979	DOWN	PHLDA1	22822	DOWN
EIF5A2	56648	DOWN	PIGR	5284	DOWN
ELF3	1999	DOWN	PLEKHG4	25894	DOWN
ELF4	2000	DOWN	PMAIP1	5366	DOWN
ELK1	2002	DOWN	POLR3A	11128	DOWN
ELL2	22936	DOWN	POU2F3	25833	DOWN
ELOVL5	60481	DOWN	PRAME	23532	DOWN
EML3	256364	DOWN	PRAMEF19	645414	DOWN
ENOSF1	55556	DOWN	PRKCB	5579	DOWN
ENTPD7	57089	DOWN	PRKCDBP	112464	DOWN
EPCAM	4072	DOWN	PRPF18	8559	DOWN
EPHX3	79852	DOWN	PTEN	5728	DOWN
ERCC6L	54821	DOWN	PTER	9317	DOWN
ERGIC2	51290	DOWN	PTGER2	5732	DOWN
ERLIN1	10613	DOWN	PTGFR	5737	DOWN
ESRP2	80004	DOWN	PTPN3	5774	DOWN
ETNK1	55500	DOWN	QPCT	25797	DOWN
ETV7	51513	DOWN	RAB11A	8766	DOWN
EVPL	2125	DOWN	RAB18	22931	DOWN
EXT1	2131	DOWN	RAB35	11021	DOWN
F2RL1	2150	DOWN	RANBP17	64901	DOWN
FAIM3	9214	DOWN	RECQL	5965	DOWN
FAM163A	148753	DOWN	RGS3	5998	DOWN
FAM175B	23172	DOWN	ROD1	9991	DOWN
FAM176B	55194	DOWN	RPP25	54913	DOWN
FAM178A	55719	DOWN	RPP30	10556	DOWN
FAM189B	10712	DOWN	RPS24	6229	DOWN
FAM21C /// FAM21D	253725	DOWN	RPS4X	6191	DOWN
FAM30A	29064	DOWN	SAR1A	56681	DOWN
FAM35A	54537	DOWN	SEPT6	23157	DOWN
FAM45A /// FAM45B	404636	DOWN	SFRP1	6422	DOWN
FAM60A	58516	DOWN	SFRP2	6423	DOWN
FAS	355	DOWN	SGPL1	8879	DOWN
FBLN2	2199	DOWN	SH3KBP1	30011	DOWN
FBN2	2201	DOWN	SHC1	6464	DOWN
FBXW7	55294	DOWN	SHISA3	152573	DOWN
FCER2	2208	DOWN	SLC13A5	284111	DOWN
FCN2	2220	DOWN	SLC23A3	151295	DOWN
FGD6	55785	DOWN	SLC25A21	89874	DOWN
FGFR1OP	11116	DOWN	SMC1B	27127	DOWN
FHL2	2274	DOWN	SMOC1	64093	DOWN
FHOD1	29109	DOWN	SORCS1	114815	DOWN
FLNB	2317	DOWN	SSTR1	6751	DOWN
FUT4	2526	DOWN	SSX5	6758	DOWN
FUT5	2527	DOWN	STARD5	80765	DOWN
FUT7	2529	DOWN	STK38L	23012	DOWN
FXYD2	486	DOWN	STRA6	64220	DOWN
FXYD5	53827	DOWN	SVIL	6840	DOWN
FZD6	8323	DOWN	TACSTD2	4070	DOWN
G3BP2	9908	DOWN	TAF5L	27097	DOWN
G6PD	2539	DOWN	TCAM1	146771	DOWN
GALNT14	79623	DOWN	TCF15	6939	DOWN
GALNT7	51809	DOWN	TCHH	7062	DOWN
GATA1	2623	DOWN	TEAD4	7004	DOWN
GBF1	8729	DOWN	TEK	7010	DOWN
GCGR	2642	DOWN	TES	26136	DOWN
GCHFR	2644	DOWN	THSD4	79875	DOWN
GCNT2	2651	DOWN	TIMM23	10431	DOWN
GDAP2	54834	DOWN	TMEM185B	79134	DOWN
GDI2	2665	DOWN	TMEM200A	114801	DOWN
GFER	2671	DOWN	TMEM30B	161291	DOWN
GFI1	2672	DOWN	TOX2	84969	DOWN
GGA2	23062	DOWN	TPBG	7162	DOWN
GHITM	27069	DOWN	TRIM58	25893	DOWN
GK	2710	DOWN	TRIM59	286827	DOWN
GLA	2717	DOWN	TSPAN14	81619	DOWN
GLRX2	51022	DOWN	TSPYL5	85453	DOWN
GLRX3	10539	DOWN	TUBB6	84617	DOWN
GLS	2744	DOWN	TUSC3	7991	DOWN
GLUD2	2747	DOWN	UBFD1	56061	DOWN
GMEB1	10691	DOWN	USP44	84101	DOWN
GOLT1B	51026	DOWN	VANGL1	81839	DOWN
GP1BB /// SEPT5	2812	DOWN	VASH2	79805	DOWN
GPR126	57211	DOWN	VEGFC	7424	DOWN
GPR15	2838	DOWN	VRK2	7444	DOWN
GPR153	387509	DOWN	WDR40B	139170	DOWN
GPR18	2841	DOWN	WNT5B	81029	DOWN
GPRIN2	9721	DOWN	XYLB	9942	DOWN
GRB7	2886	DOWN	YARS2	51067	DOWN
GRIP2	80852	DOWN	YME1L1	10730	DOWN
GRK5	2869	DOWN	ZC3HAV1L	92092	DOWN
GRK6	2870	DOWN	ZDHHC16	84287	DOWN
GRN	2896	DOWN	ZNF215	7762	DOWN
GSTO1	9446	DOWN	ZNF233	353355	DOWN
GTPBP4	23560	DOWN	ZNF385D	79750	DOWN
GUSB /// LOC100294451 /// LOC91316	100294451	DOWN	ZNF518B	85460	DOWN
GYPC	2995	DOWN	ZNF560	147741	DOWN
H2AFY2	55506	DOWN	ZNF618	114991	DOWN
HCCS	3052	DOWN	ZNF642	339559	DOWN
HCP5	10866	DOWN	ZNF695	57116	DOWN
HDHD1A	8226	DOWN	ZYG11A	440590	DOWN
HEATR1	55127	DOWN	ABCA11P	79963	UP
HECW1	23072	DOWN	ABCA17P	650655	UP
HIST1H2AD /// HIST1H3D	3013	DOWN	ABCC8	6833	UP
HIST1H2AJ	8331	DOWN	ABLIM2	84448	UP
HIST1H2BJ	8970	DOWN	ACAA1	30	UP
HIST2H2AA3 /// HIST2H2AA4	723790	DOWN	ACAD11	84129	UP
HIST3H2A	92815	DOWN	ACAD8	27034	UP
HLA-F	3134	DOWN	ACOX3	8310	UP
HNF1B	6928	DOWN	ACSM5	54988	UP
HNRNPF	3185	DOWN	ACTR5	79913	UP
HOMER2	9455	DOWN	ACTR8	93973	UP
HPRT1	3251	DOWN	ACYP2	98	UP
HPS1	3257	DOWN	ADAMTS13	11093	UP
HPS6	79803	DOWN	ADCY8	114	UP
HS3ST3A1	9955	DOWN	ADHFE1	137872	UP
HSPA14	51182	DOWN	ADSSL1	122622	UP
HTATIP2	10553	DOWN	AGFG2	3268	UP
ICA1	3382	DOWN	AGXT2L1	64850	UP
ICAM3	3385	DOWN	AHCYL1	10768	UP
ICMT	23463	DOWN	AIG1	51390	UP
IDE	3416	DOWN	AKAP1	8165	UP
IER3	8870	DOWN	ALDH1L1	10840	UP
IFIT5	24138	DOWN	ALDOC	230	UP
IFITM1	8519	DOWN	ALX3	257	UP
IGBP1	3476	DOWN	AMIGO3	386724	UP
IGH@ /// IGHG1 /// IGHG2 /// IGHM /// IGHV4-31 /// LOC100290146 /// LOC100294459	100290146	DOWN	AMZ1	155185	UP
IGHA1 /// IGHD /// IGHG1 /// IGHG2 /// IGHG3 /// IGHM /// IGHV4-31 /// LOC652494	28396	DOWN	ANKRD10	55608	UP
IGHM	3507	DOWN	ANKRD28	23243	UP
IGKV3-20	28912	DOWN	APC2	10297	UP
IGLV1-44	28823	DOWN	APLN	8862	UP
IGLV3-19	28797	DOWN	APLP1	333	UP
IKBKG	8517	DOWN	AQP1	358	UP
IKZF5	64376	DOWN	AQP11	282679	UP
IL12RB1	3594	DOWN	AQP4	361	UP
IL15RA	3601	DOWN	ARC	23237	UP
IL1R1	3554	DOWN	ARHGEF10	9639	UP
IL27RA	9466	DOWN	ARHGEF4	50649	UP
IL2RB	3560	DOWN	ARMC8	25852	UP
IL2RG	3561	DOWN	ARPP-21	10777	UP
IL4R	3566	DOWN	ARRDC4	91947	UP
INO80B	83444	DOWN	ASTN1	460	UP
INPP4B	8821	DOWN	ATG7	10533	UP
IPO8	10526	DOWN	ATP6V1G2	534	UP
IRF4	3662	DOWN	ATP9A	10079	UP
ITGA10	8515	DOWN	ATRN	8455	UP
ITGA4	3676	DOWN	B3GNT9	84752	UP
ITGAL	3683	DOWN	BAALC	79870	UP
ITGB3	3690	DOWN	BBOX1	8424	UP
ITGB7	3695	DOWN	BBS1	582	UP
JMJD1C	221037	DOWN	BNIP3	664	UP
KCNA3	3738	DOWN	BNIP3L	665	UP
KIAA0020	9933	DOWN	BRWD1	54014	UP
KIAA0125	9834	DOWN	C10orf116	10974	UP
KIAA1797	54914	DOWN	C14orf167	55449	UP
KIF20B	9585	DOWN	C14orf45	80127	UP
KIFC1	3833	DOWN	C14orf50	145376	UP
KIN	22944	DOWN	C14orf79	122616	UP
KL	9365	DOWN	C18orf16	147429	UP
KLF11	8462	DOWN	C19orf36	113177	UP
KLF5	688	DOWN	C19orf73	55150	UP
KLRB1	3820	DOWN	C1orf162	128346	UP
KRAS	3845	DOWN	C1orf213	148898	UP
KRT18	3875	DOWN	C1orf88	128344	UP
KRT19	3880	DOWN	C20orf12	55184	UP
KRT7	3855	DOWN	C20orf132	140699	UP
KRT8	3856	DOWN	C20orf194	25943	UP
KYNU	8942	DOWN	C20orf26	26074	UP
LAD1	3898	DOWN	C20orf30	29058	UP
LAMA4	3910	DOWN	C20orf39	79953	UP
LAMC1	3915	DOWN	C20orf96	140680	UP
LARP4B	23185	DOWN	C21orf131	387486	UP
LCK	3932	DOWN	C21orf34	388815	UP
LEPR	3953	DOWN	C21orf71	282566	UP
LGALS8	3964	DOWN	C22orf23	84645	UP
LIME1	54923	DOWN	C2orf15	150590	UP
LOC100287600	100287600	DOWN	C2orf21	285175	UP
LOC100288671	100288671	DOWN	C2orf81	388963	UP
LOC100294402 /// SIGIRR	100294402	DOWN	C2orf88	84281	UP
LOC10431 /// TIMM23 /// TIMM23B	100287932	DOWN	C3orf1	51300	UP
LOC286434	286434	DOWN	C3orf15	89876	UP
LOC642236	642236	DOWN	C3orf71	646450	UP
LRRFIP1	9208	DOWN	C4orf12	404201	UP
LTA	4049	DOWN	C4orf3	401152	UP
LTA4H	4048	DOWN	C4orf42	92070	UP
LTBR	4055	DOWN	C4orf47	441054	UP
LY75	4065	DOWN	C4orf6	10141	UP
LYN	4067	DOWN	C5orf27	202299	UP
LYPD3	27076	DOWN	C5orf45	51149	UP
LYPLA2 /// LYPLA2P1	11313	DOWN	C6orf26	401251	UP
LYPLA2P1	653639	DOWN	C7orf41	222166	UP
M6PR	4074	DOWN	C7orf51	222950	UP
MAGEA1	4100	DOWN	C7orf68	29923	UP
MAGEA5	4104	DOWN	C8orf42	157695	UP
MAGEB2	4113	DOWN	C8orf46	254778	UP
MALL	7851	DOWN	C8orf5	100129441	UP
MALT1	10892	DOWN	C9orf6	54942	UP
MAP4K1	11184	DOWN	C9orf61	9413	UP
MAPK1	5594	DOWN	C9orf98	158067	UP
MAPK13	5603	DOWN	CAB39L	81617	UP
MAPK14	1432	DOWN	CAPN14	440854	UP
MAPK8	5599	DOWN	CAPS2	84698	UP
MCL1	4170	DOWN	CASQ2	845	UP
MCM10	55388	DOWN	CBFA2T2	9139	UP
MCM5	4174	DOWN	CBS	875	UP
MCOLN1	57192	DOWN	CBWD5	220869	UP
MCTS1	28985	DOWN	CCDC113	29070	UP
ME1	4199	DOWN	CCDC136	64753	UP
MECP2	4204	DOWN	CCDC146	57639	UP
MFSD7	84179	DOWN	CCDC151	115948	UP
MGC87042	256227	DOWN	CCDC24	149473	UP
MGEA5	10724	DOWN	CCDC47	57003	UP
MGMT	4255	DOWN	CCDC71	64925	UP
MIA	8190	DOWN	CCT6P1	643253	UP
MICB	4277	DOWN	CIDEC	63924	UP
MID2	11043	DOWN	CIDECP	152302	UP
MINPP1	9562	DOWN	CKMT1A	548596	UP
MKI67	4288	DOWN	CLDND1	56650	UP
MLLT10	8028	DOWN	CLEC18B	497190	UP
MLPH	79083	DOWN	CLEC5A	23601	UP
MLX	6945	DOWN	CMTM5	116173	UP
MMP7	4316	DOWN	CNDP1	84735	UP
MMS19	64210	DOWN	CNGA3	1261	UP
MOBKL1B	55233	DOWN	CNOT7	29883	UP
MOBKL2B	79817	DOWN	CNTN2	6900	UP
MPZL1	9019	DOWN	COL28A1	340267	UP
MRPS16	51021	DOWN	CREBZF	58487	UP
MS4A1	931	DOWN	CRISPLD1	83690	UP
MSC	9242	DOWN	CRMP1	1400	UP
MSL3	10943	DOWN	CRYBG3	131544	UP
MSRB2	22921	DOWN	CRYZL1	9946	UP
MST4	51765	DOWN	CTNND2	1501	UP
MTF2	22823	DOWN	CXCR7	57007	UP
MTG1	92170	DOWN	CXXC5	51523	UP
MUC3A /// MUC3B	4584	DOWN	CYHR1	50626	UP
MXD4	10608	DOWN	CYP2U1	113612	UP
MYL12A	10627	DOWN	DAOA	267012	UP
MYL12A /// MYL12B	103910	DOWN	DCLK1	9201	UP
MYO19	80179	DOWN	DCUN1D2	55208	UP
MYO1B	4430	DOWN	DDIT4L	115265	UP
MYO1E	4643	DOWN	DENND5A	23258	UP
N4BP1	9683	DOWN	DHRS4	10901	UP
N6AMT1	29104	DOWN	DIDO1	11083	UP
NANS	54187	DOWN	DLEC1	9940	UP
NAPG	8774	DOWN	DNAH12	201625	UP
NBL1	4681	DOWN	DNAJB2	3300	UP
NCKAP1L	3071	DOWN	DNAJC30	84277	UP
NCOA4	8031	DOWN	DNER	92737	UP
NCR3	259197	DOWN	DNHD1	144132	UP
NDN	4692	DOWN	DOCK7	85440	UP
NDUFB8	4714	DOWN	DPP6	1804	UP
NDUFB8 /// SEC31B	25956	DOWN	DPYSL2	1808	UP
NEK2	4751	DOWN	DSEL	92126	UP
NET1	10276	DOWN	DTNA	1837	UP
NETO2	81831	DOWN	DUS4L	11062	UP
NFATC2IP	84901	DOWN	DYNC1H1	1778	UP
NFKB2	4791	DOWN	DYNLRB2	83657	UP
NHEJ1	79840	DOWN	EBF4	57593	UP
NHP2L1	4809	DOWN	ECE2	9718	UP
NMI	9111	DOWN	ECM2	1842	UP
NOC3L	64318	DOWN	EFCAB3	146779	UP
NOLC1	9221	DOWN	EFEMP1	2202	UP
NOP10	55505	DOWN	EFHD1	80303	UP
NOP2	4839	DOWN	EGFR	1956	UP
NPM3	10360	DOWN	EGLN3	112399	UP
NPTX2	4885	DOWN	EIF5	1983	UP
NRBP1	29959	DOWN	EP400NL	347918	UP
NRXN3	9369	DOWN	EPB41L4A	64097	UP
NSDHL	50814	DOWN	EPHX2	2053	UP
NSMCE4A	54780	DOWN	EPS8L2	64787	UP
NUDT21	11051	DOWN	ERBB2IP	55914	UP
NUDT4 /// NUDT4P1	11163	DOWN	ERMN	57471	UP
NUP37	79023	DOWN	EVL	51466	UP
NUP50	10762	DOWN	EYA2	2139	UP
OBFC1	79991	DOWN	EZR	7430	UP
OSBPL10	114884	DOWN	F11R	50848	UP
P2RY10	27334	DOWN	FAHD2A	51011	UP
P2RY6	5031	DOWN	FAHD2B	151313	UP
PACSIN2	11252	DOWN	FAM107A	11170	UP
PADI1	29943	DOWN	FAM123A	219287	UP
PAK2	5062	DOWN	FAM135B	51059	UP
PAPSS2	9060	DOWN	FAM154B	283726	UP
PARD3	56288	DOWN	FAM165B	54065	UP
PARVB	29780	DOWN	FAM172A	83989	UP
PAX5	5079	DOWN	FAM175A	84142	UP
PAX8	7849	DOWN	FAM181A	90050	UP
PCBP3	54039	DOWN	FAM181B	220382	UP
PCNX	22990	DOWN	FAM182A	284800	UP
PCSK6	5046	DOWN	FAM182B	728882	UP
PDCD11	22984	DOWN	FAM47E	100129583	UP
PDCD4	27250	DOWN	FAM86D	692099	UP
PDLIM1	9124	DOWN	FAM91A2	57234	UP
PDLIM4	8572	DOWN	FBXO15	201456	UP
PDPK1	5170	DOWN	FBXO17	115290	UP
PDPR	55066	DOWN	FBXO36	130888	UP
PENK	5179	DOWN	FBXO41	150726	UP
PES1	23481	DOWN	FCGR3A	2214	UP
PEX16	9409	DOWN	FGR	2268	UP
PFDN2	5202	DOWN	FHL1	2273	UP
PHLDA2	7262	DOWN	FLJ14213	79899	UP
PI4K2A	55361	DOWN	FLJ22536	401237	UP
PIH1D1	55011	DOWN	FLJ26850	400710	UP
PIM2	11040	DOWN	FLJ32065	201283	UP
PIN4	5303	DOWN	FLJ35220	284131	UP
PIP5K1A	8394	DOWN	FLJ40125	147699	UP
PITRM1	10531	DOWN	FLJ40852	285962	UP
PKP3	11187	DOWN	FLJ41603	389337	UP
PLA2G3	50487	DOWN	FLJ43080	642987	UP
PLAA	9373	DOWN	FLJ43663	378805	UP
PLAC1	10761	DOWN	FLJ45244	400242	UP
PLAG1	5324	DOWN	FMNL2	114793	UP
PLD1	5337	DOWN	FMOD	2331	UP
PMAIP1	5366	DOWN	FNTA	2339	UP
PMCH	5367	DOWN	FRAG1	27315	UP
PML	5371	DOWN	GALNTL2	117248	UP
PMS2L11	441263	DOWN	GATAD1	57798	UP
PNPLA4	8228	DOWN	GATM	2628	UP
POLD4	57804	DOWN	GBE1	2632	UP
POLDIP3	84271	DOWN	GDAP1	54332	UP
POU2AF1	5450	DOWN	GDF9	2661	UP
POU2F3	25833	DOWN	GFAP	2670	UP
POU5F1 /// POU5F1B /// POU5F1P3 /// POU5F1P4	5460	DOWN	GGT7	2686	UP
PPA1	5464	DOWN	GK5	256356	UP
PPARG	5468	DOWN	GNA12	2768	UP
PPIE	10450	DOWN	GNL3	26354	UP
PPM1B	5495	DOWN	GOLGA8D	100132979	UP
PPP1R7	5510	DOWN	GPIHBP1	338328	UP
PPP2R2D	55844	DOWN	GPR62	118442	UP
PPP3CB	5532	DOWN	GPRASP1	9737	UP
PPPDE2	27351	DOWN	GRAMD3	65983	UP
PQBP1	10084	DOWN	GRIN2C	2905	UP
PRAME	23532	DOWN	GSG1L	146395	UP
PRF1	5551	DOWN	GZF1	64412	UP
PRG2	5553	DOWN	HEATR5A	25938	UP
PRKCB	5579	DOWN	HEMK1	51409	UP
PRKCDBP	112464	DOWN	HEPN1	641654	UP
PRKCH	5583	DOWN	HEY2	23493	UP
PRMT1	3276	DOWN	HHATL	57467	UP
PRPF18	8559	DOWN	HHLA3	11147	UP
PRPS2	5634	DOWN	HIPK2	28996	UP
PRR5	55615	DOWN	HOXA3	3200	UP
PSD4	23550	DOWN	HOXA5	3202	UP
PSME4	23198	DOWN	HOXD10	3236	UP
PTEN	5728	DOWN	HOXD3	3232	UP
PTEN /// PTENP1	11191	DOWN	HSPB8	26353	UP
PTER	9317	DOWN	ICA1L	130026	UP
PTGFR	5737	DOWN	ID3	3399	UP
PTK2B	2185	DOWN	IFT80	57560	UP
PTPN2	5771	DOWN	IGFBP5	3488	UP
PTPN3	5774	DOWN	IGSF11	152404	UP
PTPN6	5777	DOWN	IKBKB	3551	UP
PTPRCAP	5790	DOWN	IL17D	53342	UP
QPCT	25797	DOWN	IL25	64806	UP
RAB11A	8766	DOWN	IL33	90865	UP
RAB11FIP1	80223	DOWN	IL5	3567	UP
RAB25	57111	DOWN	INHBB	3625	UP
RAB27A	5873	DOWN	INSM1	3642	UP
RAB35	11021	DOWN	IP6K2	51447	UP
RAB38	23682	DOWN	ITPKB	3707	UP
RAB8B	51762	DOWN	JAKMIP2	9832	UP
RABGAP1L	9910	DOWN	JMY	133746	UP
RAC2	5880	DOWN	KAL1	3730	UP
RAD51	5888	DOWN	KAT	100131187	UP
RANBP1	5902	DOWN	KCNH2	3757	UP
RANBP17	64901	DOWN	KCNIP1	30820	UP
RARG	5916	DOWN	KCNMB2	10242	UP
RASAL2	9462	DOWN	KCNN2	3781	UP
RBM12B	389677	DOWN	KHK	3795	UP
RBMS2	5939	DOWN	KIAA0562	9731	UP
RCC1 /// SNHG3-RCC1	1104	DOWN	KIAA1407	57577	UP
RECQL	5965	DOWN	KIAA1908	114796	UP
RECQL4	9401	DOWN	KIFC2	90990	UP
REST	5978	DOWN	KIRREL2	84063	UP
RFPL1S	10740	DOWN	KLF15	28999	UP
RGNEF	64283	DOWN	KLHDC1	122773	UP
RGS10	6001	DOWN	KLHDC9	126823	UP
RGS3	5998	DOWN	L3MBTL	26013	UP
RGSL1	353299	DOWN	LANCL2	55915	UP
RHOD	29984	DOWN	LDB3	11155	UP
RHOF	54509	DOWN	LHFPL4	375323	UP
RHOH	399	DOWN	LHX9	56956	UP
RIMS2	9699	DOWN	LMO3	55885	UP
RIPK4	54101	DOWN	LMOD1	25802	UP
RNF113A	7737	DOWN	LOC100128008	100128008	UP
RNMT	8731	DOWN	LOC100128809	100128809	UP
ROD1	9991	DOWN	LOC100128844	100128844	UP
RPL10	6134	DOWN	LOC100129973	100129973	UP
RPL10A	4736	DOWN	LOC100130054	100130054	UP
RPL13	6137	DOWN	LOC100131452	100131452	UP
RPL13A	23521	DOWN	LOC100131813	100131813	UP
RPL17	6139	DOWN	LOC100133953	100133953	UP
RPL22	6146	DOWN	LOC100134018	100134018	UP
RPL3	6122	DOWN	LOC100134119	100134119	UP
RPL31	6160	DOWN	LOC100134317	100134317	UP
RPL36A	6173	DOWN	LOC100134327	100134327	UP
RPL36AL	6166	DOWN	LOC100190939	100190939	UP
RPL7A	6130	DOWN	LOC126661	126661	UP
RPP25	54913	DOWN	LOC149351	149351	UP
RPP30	10556	DOWN	LOC149832	149832	UP
RPS17	6218	DOWN	LOC150568	150568	UP
RPS24	6229	DOWN	LOC154761	154761	UP
RPS3	6188	DOWN	LOC154822	154822	UP
RPS4X	6191	DOWN	LOC199899	199899	UP
RPS6KA3	6197	DOWN	LOC201229	201229	UP
RPS6KB2	6199	DOWN	LOC220594	220594	UP
RRM2	6241	DOWN	LOC257396	257396	UP
RRP7A	27341	DOWN	LOC283481	283481	UP
RTCD1	8634	DOWN	LOC284112	284112	UP
RTF1	23168	DOWN	LOC284998	284998	UP
RUNX1	861	DOWN	LOC286260	286260	UP
RUNX3	864	DOWN	LOC375295	375295	UP
S100A11	6282	DOWN	LOC388002	388002	UP
S100A4	6275	DOWN	LOC389458	389458	UP
SAR1A	56681	DOWN	LOC400043	400043	UP
SARS	6301	DOWN	LOC439938	439938	UP
SCYL3	57147	DOWN	LOC440243	440243	UP
SDF2L1	23753	DOWN	LOC442609	442609	UP
SEC23IP	11196	DOWN	LOC643763	643763	UP
SECTM1	6398	DOWN	LOC644662	644662	UP
SEL1L3	23231	DOWN	LOC645323	645323	UP
SEMA4A	64218	DOWN	LOC645619	645619	UP
SEMA7A	8482	DOWN	LOC647979	647979	UP
SEPHS1	22929	DOWN	LOC653256	653256	UP
SEPT6	23157	DOWN	LOC653414	653414	UP
SFRP1	6422	DOWN	LOC727770	727770	UP
SFT2D2	375035	DOWN	LOC727869	727869	UP
SGK269	79834	DOWN	LOC728198	728198	UP
SGPL1	8879	DOWN	LOC728199	728199	UP
SH2D1A	4068	DOWN	LOC728621	728621	UP
SHC1	6464	DOWN	LOC729013	729013	UP
SHOC2	8036	DOWN	LOC729234	729234	UP
SIK1	150094	DOWN	LOC729556	729556	UP
SIX2	10736	DOWN	LOC729678	729678	UP
SKAP1	8631	DOWN	LOC729680	729680	UP
SLAMF1	6504	DOWN	LOC730091	730091	UP
SLAMF8	56833	DOWN	LOC92973	92973	UP
SLC16A3	9123	DOWN	LOH12CR2	503693	UP
SLC16A5	9121	DOWN	LONRF1	91694	UP
SLC18A3	6572	DOWN	LOX	4015	UP
SLC1A5	6510	DOWN	LPIN2	9663	UP
SLC25A21	89874	DOWN	LRIG1	26018	UP
SLC25A24	29957	DOWN	LRP2BP	55805	UP
SLC25A6	293	DOWN	LRRC16B	90668	UP
SLC27A2	11001	DOWN	LRRC2	79442	UP
SLC45A2	51151	DOWN	LRRC28	123355	UP
SLC5A5	6528	DOWN	LRRC34	151827	UP
SLCO5A1	81796	DOWN	LRRC37B2	147172	UP
SLIT2	9353	DOWN	LRRC48	83450	UP
SLK	9748	DOWN	LRTOMT	220074	UP
SMAD7	4092	DOWN	LSS	4047	UP
SMNDC1	10285	DOWN	LY6G5C	80741	UP
SMTN	6525	DOWN	LYNX1	66004	UP
SNAI1	6615	DOWN	MAG	4099	UP
SNAP29	9342	DOWN	MAP6D1	79929	UP
SNCA	6622	DOWN	MAP7	9053	UP
SNRPD3	6634	DOWN	MAPT	4137	UP
SP100	6672	DOWN	MASP1	5648	UP
SPTLC2	9517	DOWN	MAT2A	4144	UP
SQLE	6713	DOWN	MATN2	4147	UP
SQRDL	58472	DOWN	MCCC1	56922	UP
SRD5A1	6715	DOWN	MED29	55588	UP
SSR2	6746	DOWN	MFAP3L	9848	UP
STAG3	10734	DOWN	MFF	56947	UP
STAM2	10254	DOWN	MFSD2	84879	UP
STAP1	26228	DOWN	MFSD4	148808	UP
STAT4	6775	DOWN	MFSD8	256471	UP
STAT6	6778	DOWN	MGC42105	167359	UP
STRA6	64220	DOWN	MGC9913	386759	UP
STS	412	DOWN	MLF1	4291	UP
SUPT4H1	6827	DOWN	MLH3	27030	UP
SVIL	6840	DOWN	MORN5	254956	UP
TACSTD2	4070	DOWN	MOSC1	64757	UP
TAF5	6877	DOWN	MPI	4351	UP
TAF6L	10629	DOWN	MRAP	56246	UP
TBC1D9	23158	DOWN	MRAS	22808	UP
TBX21	30009	DOWN	MSX1	4487	UP
TCEB3	6924	DOWN	MYCBPAP	84073	UP
TCL1A	8115	DOWN	MYH3	4621	UP
TEAD4	7004	DOWN	MYH7	4625	UP
TES	26136	DOWN	MYH7B	57644	UP
TFAM	7019	DOWN	MYO16	23026	UP
TFIP11	24144	DOWN	NACAD	23148	UP
THG1L	54974	DOWN	NAP1L2	4674	UP
TIAL1	7073	DOWN	NAT6	24142	UP
TK1	7083	DOWN	NCRNA00087	644596	UP
TM9SF3	56889	DOWN	NDRG2	57447	UP
TMEM183A /// TMEM183B	653659	DOWN	NEK11	79858	UP
TMEM185B	79134	DOWN	NEK4	6787	UP
TMEM30B	161291	DOWN	NFASC	23114	UP
TNF	7124	DOWN	NKX2-1	7080	UP
TNFAIP8	25816	DOWN	NLGN1	22871	UP
TNFRSF17	608	DOWN	NME5	8382	UP
TNFRSF8	943	DOWN	NMNAT3	349565	UP
TNFSF10	8743	DOWN	NOL3	8996	UP
TOMM70A	9868	DOWN	NOL4	8715	UP
TOP3B	8940	DOWN	NOVA1	4857	UP
TP53TG3 /// TP53TG3B	24150	DOWN	NOXA1	10811	UP
TP53TG5	27296	DOWN	NPHP1	4867	UP
TPBG	7162	DOWN	NRBP2	340371	UP
TPST2	8459	DOWN	NRG2	9542	UP
TRA@	6955	DOWN	NRL	4901	UP
TRA@ /// TRAC /// TRAJ17 /// TRAV20	28663	DOWN	NRN1L	123904	UP
TRABD	80305	DOWN	NSFL1C	55968	UP
TRAC	28755	DOWN	NTM	50863	UP
TRAF1	7185	DOWN	NTRK2	4915	UP
TRAF3	7187	DOWN	NTSR2	23620	UP
TRAF3IP3	80342	DOWN	NUBPL	80224	UP
TRIB1	10221	DOWN	NUDT16	131870	UP
TRIM38	10475	DOWN	OGG1	4968	UP
TRIM58	25893	DOWN	OLIG1	116448	UP
TRPM8	79054	DOWN	OLIG2	10215	UP
TRPV2	51393	DOWN	OMG	4974	UP
TSPYL5	85453	DOWN	OSBPL11	114885	UP
TSTA3	7264	DOWN	OSBPL2	9885	UP
TTC12	54970	DOWN	OTOS	150677	UP
TTN	7273	DOWN	OVGP1	5016	UP
TUBB6	84617	DOWN	P4HTM	54681	UP
TUBGCP2	10844	DOWN	PABPC1L	80336	UP
TUSC3	7991	DOWN	PACRG	135138	UP
TWF2	11344	DOWN	PAMR1	25891	UP
TXNRD2	10587	DOWN	PAN2	9924	UP
UBE2K	3093	DOWN	PAQR6	79957	UP
UBIAD1	29914	DOWN	PARP3	10039	UP
UBN1	29855	DOWN	PCDH9	5101	UP
UBR2	23304	DOWN	PCDHA10	56139	UP
UCK2	7371	DOWN	PCDHB10	56126	UP
UFD1L	7353	DOWN	PCDHB12	56124	UP
UGGT1	56886	DOWN	PCDHB16	57717	UP
UPF2	26019	DOWN	PCDHB17	54661	UP
UROS	7390	DOWN	PCDHB6	56130	UP
USP15	9958	DOWN	PCDHB7	56129	UP
VANGL1	81839	DOWN	PCDHB9	56127	UP
VARS	7407	DOWN	PCNP	57092	UP
VCX2	51480	DOWN	PCNXL2	80003	UP
VDAC2	7417	DOWN	PCSK4	54760	UP
VPS26A	9559	DOWN	PDDC1	347862	UP
VRK2	7444	DOWN	PDE6B	5158	UP
WAC	51322	DOWN	PDZK1IP1	10158	UP
WAPAL	23063	DOWN	PEX1	5189	UP
WDR59	79726	DOWN	PFKFB4	5210	UP
WDR76	79968	DOWN	PGAM2	5224	UP
WDR77	79084	DOWN	PI16	221476	UP
WFDC2	10406	DOWN	PILRB	29990	UP
WIPF1	7456	DOWN	PLA2G12A	81579	UP
WNT5B	81029	DOWN	PLA2G4C	8605	UP
XCL1 /// XCL2	6375	DOWN	PLK5P	126520	UP
XPNPEP1	7511	DOWN	PLOD2	5352	UP
YARS2	51067	DOWN	PLSCR4	57088	UP
YME1L1	10730	DOWN	PLXNB3	5365	UP
ZBTB32	27033	DOWN	PMP22	5376	UP
ZC3HAV1	56829	DOWN	PNMA2	10687	UP
ZDHHC6	64429	DOWN	POM121	9883	UP
ZNF33B	7582	DOWN	POM121L9P	29774	UP
ZNF385D	79750	DOWN	POPDC2	64091	UP
ZP2	7783	DOWN	PPAP2A	8611	UP
ZRSR2	8233	DOWN	PPFIA1	8500	UP
AASS	10157	UP	PPP1R16A	84988	UP
ABAT	18	UP	PPP1R1B	84152	UP
ABCA1	19	UP	PPP1R3E	90673	UP
ABCA2	20	UP	PRKRIP1	79706	UP
ABCA8	10351	UP	PRNP	5621	UP
ABCB6	10058	UP	PRUNE2	158471	UP
ABHD14A	25864	UP	PSD2	84249	UP
ABHD4	63874	UP	PSMF1	9491	UP
ABHD6	57406	UP	PSTPIP1	9051	UP
ACAA1	30	UP	PTPRF	5792	UP
ACAD8	27034	UP	PTPRN2	5799	UP
ACCN2	41	UP	PTTG1IP	754	UP
ACCN3	9311	UP	ProSAPiP1	9762	UP
ACOX3	8310	UP	QKI	9444	UP
ACSM5	54988	UP	RAB6B	51560	UP
ACTR8	93973	UP	RABL2A	11159	UP
ACYP2	98	UP	RABL2B	11158	UP
ADCY2	108	UP	RAMP1	10267	UP
ADCY8	114	UP	RASL10A	10633	UP
ADD1	118	UP	RASSF2	9770	UP
AEBP1	165	UP	RAVER2	55225	UP
AGAP1	116987	UP	RDX	5962	UP
AGFG2	3268	UP	REEP2	51308	UP
AGGF1	55109	UP	RFX2	5990	UP
AGK	55750	UP	RFX4	5992	UP
AGT	183	UP	RGS1	5996	UP
AGXT2L1	64850	UP	RGS9	8787	UP
AHCYL1	10768	UP	RGS9BP	388531	UP
AK3L1	205	UP	RHBDL3	162494	UP
AKAP1	8165	UP	RHOU	58480	UP
AKAP11	11215	UP	RHPN1	114822	UP
AKT3	10000	UP	RIC3	79608	UP
AKTIP	64400	UP	RNF141	50862	UP
ALAD	210	UP	RNF19A	25897	UP
ALDH1L1	10840	UP	RP5-1022P6.2	56261	UP
ALDH2	217	UP	RSPH1	89765	UP
ALDH3A2	224	UP	S100A2	6273	UP
ALDH4A1	8659	UP	SCD5	79966	UP
ALDH5A1	7915	UP	SCGB1D1	10648	UP
ALDH6A1	4329	UP	SCGB1D2	10647	UP
ALDH7A1	501	UP	SCN2B	6327	UP
ALDOC	230	UP	SCUBE2	57758	UP
ALG6	29929	UP	SDR39U1	56948	UP
ANAPC13	25847	UP	SEC14L5	9717	UP
ANK2	287	UP	SEC22C	9117	UP
ANKMY2	57037	UP	SELV	348303	UP
ANKRA2	57763	UP	SEMA3B	7869	UP
ANKRD28	23243	UP	SENP2	59343	UP
ANKRD6	22881	UP	SENP6	26054	UP
ANXA5	308	UP	SEPT4	5414	UP
AP3S2	10239	UP	SEPT8	23176	UP
APBB3	10307	UP	SERP2	387923	UP
APC	324	UP	SETD4	54093	UP
APC2	10297	UP	SFTA3	253970	UP
APLP1	333	UP	SFTPC	6440	UP
APOE	348	UP	SGEF	26084	UP
APP	351	UP	SHD	56961	UP
APPBP2	10513	UP	SIM2	6493	UP
APPL1	26060	UP	SIRT3	23410	UP
AQP1	358	UP	SLC11A2	4891	UP
AQP4	361	UP	SLC14A1	6563	UP
ARAP2	116984	UP	SLC16A1	6566	UP
ARC	23237	UP	SLC22A17	51310	UP
ARF4	378	UP	SLC22A5	6584	UP
ARFRP1	10139	UP	SLC23A2	9962	UP
ARHGAP5	394	UP	SLC29A4	222962	UP
ARHGEF10	9639	UP	SLC2A1	6513	UP
ARHGEF10L	55160	UP	SLC2A4RG	56731	UP
ARHGEF4	50649	UP	SLC39A12	221074	UP
ARHGEF7	8874	UP	SLC47A2	146802	UP
ARIH2	10425	UP	SLC6A1	6529	UP
ARL4C	10123	UP	SLC6A8	6535	UP
ARL8B	55207	UP	SLITRK3	22865	UP
ARMC8	25852	UP	SLMO1	10650	UP
ARNT2	9915	UP	SMARCD3	6604	UP
ASAH1	427	UP	SNHG8	100093630	UP
ASTN1	460	UP	SNTA1	6640	UP
ASXL1	171023	UP	SOD2	6648	UP
ATG12	9140	UP	SOHLH2	54937	UP
ATG5	9474	UP	SON	6651	UP
ATP1A2	477	UP	SOX2OT	347689	UP
ATP2A2	488	UP	SPAG1	6674	UP
ATP2B2	491	UP	SPAG8	26206	UP
ATP2C1	27032	UP	SPARCL1	8404	UP
ATP5S	27109	UP	SPATA2	9825	UP
ATP6V0E2	155066	UP	SPATA20	64847	UP
ATP6V1G2	534	UP	SPATA4	132851	UP
ATP9A	10079	UP	SPDYE1	285955	UP
ATRN	8455	UP	SPEF1	25876	UP
ATRX	546	UP	SPTBN4	57731	UP
ATXN1	6310	UP	SRPK3	26576	UP
ATXN7L3B	552889	UP	SRXN1	140809	UP
B3GAT1	27087	UP	SSH3	54961	UP
B3GNT1	11041	UP	STAG3OS	352954	UP
BAALC	79870	UP	STC2	8614	UP
BACE1	23621	UP	STOML3	161003	UP
BAI2	576	UP	STON2	85439	UP
BBOX1	8424	UP	STRADB	55437	UP
BBS1	582	UP	STX16	8675	UP
BCAN	63827	UP	SUMF2	25870	UP
BCAS1	8537	UP	SYS1-DBNDD2	767557	UP
BCHE	590	UP	SYTL4	94121	UP
BCL6	604	UP	TBC1D9B	23061	UP
BEST1	7439	UP	TCEAL2	140597	UP
BEX1	55859	UP	TFRC	7037	UP
BEX4	56271	UP	TJP2	9414	UP
BHLHE41	79365	UP	TM7SF2	7108	UP
BMP7	655	UP	TMEM106B	54664	UP
BNIP3	664	UP	TMEM144	55314	UP
BNIP3L	665	UP	TMEM176A	55365	UP
BPGM	669	UP	TMEM176B	28959	UP
BRAP	8315	UP	TMEM178	130733	UP
BSDC1	55108	UP	TMEM38A	79041	UP
C14orf132	56967	UP	TMEM42	131616	UP
C14orf45	80127	UP	TMEM59L	25789	UP
C16orf45	89927	UP	TMIE	259236	UP
C16orf7	9605	UP	TMOD4	29765	UP
C17orf108	201229	UP	TMPRSS5	80975	UP
C18orf1	753	UP	TNIK	23043	UP
C19orf42	79086	UP	TNNC2	7125	UP
C1orf61	10485	UP	TNNI3K	51086	UP
C1orf77	26097	UP	TPPP	11076	UP
C20orf117	140710	UP	TPST1	8460	UP
C20orf12	55184	UP	TRIM2	23321	UP
C20orf43	51507	UP	TRIM23	373	UP
C2orf68	388969	UP	TRIM9	114088	UP
C2orf72	257407	UP	TSNAXIP1	55815	UP
C3	718	UP	TTC21A	199223	UP
C3orf18	51161	UP	TTC23	64927	UP
C3orf63	23272	UP	TTYH2	94015	UP
C4A /// C4B /// LOC100292046 /// LOC100294156	100292046	UP	TXNDC6	347736	UP
C5orf4	10826	UP	U2AF1L4	199746	UP
C5orf42	65250	UP	UBL4B	164153	UP
C5orf44	80006	UP	UBR5	51366	UP
C6orf124	653483	UP	UCN	7349	UP
C6orf134	79969	UP	UNC84A	23353	UP
C6orf26	401251	UP	USP2	9099	UP
C7orf28B	221960	UP	USP36	57602	UP
C7orf64	84060	UP	USP6	9098	UP
C8orf33	65265	UP	UST	10090	UP
C9orf6	54942	UP	UTP23	84294	UP
C9orf7	11094	UP	VCAN	1462	UP
CACNA1A	773	UP	VEGFA	7422	UP
CALD1	800	UP	VIPR2	7434	UP
CALM1	801	UP	VPRBP	9730	UP
CAMK2N1	55450	UP	WASF3	10810	UP
CAMTA1	23261	UP	WBSCR16	81554	UP
CAND1	55832	UP	WDR45L	56270	UP
CAND2	23066	UP	WDR60	55112	UP
CANX	821	UP	WDR78	79819	UP
CAP2	10486	UP	WHSC1	7468	UP
CAPN3	825	UP	WNT7A	7476	UP
CBFA2T2	9139	UP	WRB	7485	UP
CBS	875	UP	XKR6	286046	UP
CC2D1A	54862	UP	YPEL4	219539	UP
CCDC121	79635	UP	ZCWPW1	55063	UP
CCT6B	10693	UP	ZDHHC11	79844	UP
CD44	960	UP	ZDHHC17	23390	UP
CD81	975	UP	ZFHX2	85446	UP
CD99	4267	UP	ZFP2	80108	UP
CDC14B	8555	UP	ZFYVE16	9765	UP
CDH10	1008	UP	ZKSCAN5	23660	UP
CDH13	1012	UP	ZMYND12	84217	UP
CDH2	1000	UP	ZNF204	7754	UP
CDK12	51755	UP	ZNF251	90987	UP
CDK2AP1	8099	UP	ZNF334	55713	UP
CDK5R1	8851	UP	ZNF337	26152	UP
CDKL3	51265	UP	ZNF34	80778	UP
CDKN1C	1028	UP	ZNF395	55893	UP
CDO1	1036	UP	ZNF433	163059	UP
CELSR2	1952	UP	ZNF434	54925	UP
CELSR3	1951	UP	ZNF492	57615	UP
CENPB	1059	UP	ZNF680	340252	UP
CEP68	23177	UP	ZNF767	79970	UP
CEP70	80321	UP	ZNF783	155060	UP
CHMP2B	25978	UP	ZNF839	55778	UP
CIAO1	9391	UP	hCG_1643808	100130933	UP
CIRBP	1153	UP	hCG_1817306	100130691	UP
CKB	1152	UP
CLASP2	23122	UP
CLCN3	1182	UP
CLCN6	1185	UP
CLDND1	56650	UP
CLEC5A	23601	UP
CLIP2	7461	UP
CLIP3	25999	UP
CLN8	2055	UP
CLU	1191	UP
CLUAP1	23059	UP
CNGA3	1261	UP
CNOT4	4850	UP
CNP	1267	UP
CNTNAP1	8506	UP
COBL	23242	UP
COG5	10466	UP
COPG2IT1	53844	UP
CPE	1363	UP
CPEB1	64506	UP
CRB1	23418	UP
CRCP	27297	UP
CREBZF	58487	UP
CRELD1	78987	UP
CRMP1	1400	UP
CRYAB	1410	UP
CRYBG3	131544	UP
CRYL1	51084	UP
CSNK1A1	1452	UP
CSNK1D	1453	UP
CSNK2A1 /// CSNK2A1P	1457	UP
CSPG5	10675	UP
CSRP1	1465	UP
CSRP2	1466	UP
CST3	1471	UP
CTNNA1	1495	UP
CTNNA2	1496	UP
CTNND2	1501	UP
CTSF	8722	UP
CUL3	8452	UP
CUX1	1523	UP
CX3CR1	1524	UP
CXCR7	57007	UP
CYLD	1540	UP
CYP46A1	10858	UP
DAAM2	23500	UP
DAG1	1605	UP
DALRD3	55152	UP
DBN1	1627	UP
DBNDD2 /// SYS1 /// SYS1-DBNDD2	55861	UP
DCLK1	9201	UP
DCLK2	166614	UP
DDAH2	23564	UP
DDHD2	23259	UP
DDR1	780	UP
DEAF1	10522	UP
DEGS1	8560	UP
DENND2A	27147	UP
DENND5A	23258	UP
DFNA5	1687	UP
DGKB	1607	UP
DHRS4 /// DHRS4L2	10901	UP
DHX40	79665	UP
DIDO1	11083	UP
DLG1	1739	UP
DNAH7	56171	UP
DNAJB2	3300	UP
DNAJB9	4189	UP
DNAJC6	9829	UP
DOK5	55816	UP
DOM3Z	1797	UP
DPP6	1804	UP
DPY19L2P2	349152	UP
DPYSL2	1808	UP
DPYSL3	1809	UP
DPYSL4	10570	UP
DST	667	UP
DSTN	11034	UP
DTNA	1837	UP
DUS4L	11062	UP
DVL3	1857	UP
DYNC1LI2	1783	UP
DZIP1	22873	UP
DZIP3	9666	UP
ECM2	1842	UP
EDNRB	1910	UP
EEA1	8411	UP
EFEMP1	2202	UP
EFHD1	80303	UP
EFS	10278	UP
EGFR	1956	UP
EGLN3	112399	UP
EIF4G2	1982	UP
EIF5	1983	UP
ELMO2	63916	UP
EN2	2020	UP
ENAH	55740	UP
ENO2	2026	UP
ENOPH1	58478	UP
EPAS1	2034	UP
EPB41L1	2036	UP
EPM2A	7957	UP
EPM2AIP1	9852	UP
ERBB2IP	55914	UP
ERLIN2	11160	UP
ERP44	23071	UP
ETV1	2115	UP
EVI5	7813	UP
EXOC1	55763	UP
EXOG	9941	UP
EZH1	2145	UP
F8	2157	UP
FADS2	9415	UP
FAHD2A	51011	UP
FAIM	55179	UP
FAIM2	23017	UP
FAM107A	11170	UP
FAM131A	131408	UP
FAM131B	9715	UP
FAM134B	54463	UP
FAM169A	26049	UP
FAM171A1	221061	UP
FAM172A	83989	UP
FAM182B	728882	UP
FAM189A2	9413	UP
FAM70A	55026	UP
FAM86A	196483	UP
FAM86B1	85002	UP
FAM8A1	51439	UP
FANCF	2188	UP
FBXO11	80204	UP
FBXO17 /// SARS2	115290	UP
FBXO21	23014	UP
FBXO3	26273	UP
FBXO41	150726	UP
FBXO42	54455	UP
FBXW11	23291	UP
FCGBP	8857	UP
FERMT1	55612	UP
FERMT2	10979	UP
FEZ1	9638	UP
FEZ2	9637	UP
FGF1	2246	UP
FGF2	2247	UP
FGFR3	2261	UP
FHL1	2273	UP
FKTN	2218	UP
FLJ10357	55701	UP
FN1	2335	UP
FNTA	2339	UP
FRY	10129	UP
FRZB	2487	UP
FTH1	2495	UP
FTO	79068	UP
FUBP3	8939	UP
FUT9	10690	UP
FXYD6	53826	UP
FYN	2534	UP
G6PC3	92579	UP
GAB2	9846	UP
GADD45G	10912	UP
GALC	2581	UP
GAMT	2593	UP
GAP43	2596	UP
GART	2618	UP
GATAD1	57798	UP
GATM	2628	UP
GBAS	2631	UP
GBE1	2632	UP
GCFC1	94104	UP
GDF1 /// LASS1	10715	UP
GDI1	2664	UP
GFAP	2670	UP
GFPT2	9945	UP
GJA1	2697	UP
GLT8D1	55830	UP
GLUL	2752	UP
GMFB	2764	UP
GNA12	2768	UP
GOLGA7	51125	UP
GOLIM4	27333	UP
GORASP1	64689	UP
GOSR2	9570	UP
GPATCH8	23131	UP
GPM6A	2823	UP
GPM6B	2824	UP
GPR125	166647	UP
GPR137B	7107	UP
GPR19	2842	UP
GPR37	2861	UP
GPR56	9289	UP
GPRASP1	9737	UP
GPRC5B	51704	UP
GRAMD3	65983	UP
GRIK2	2898	UP
GRK4	2868	UP
GSTA4	2941	UP
GYS1	2997	UP
H2AFV	94239	UP
H3F3B	3021	UP
HABP4	22927	UP
HEXIM1	10614	UP
HHLA3	11147	UP
HIGD1A	25994	UP
HIP1R /// LOC100294412	100294412	UP
HIPK2	28996	UP
HNRNPK	3190	UP
HNRPDL	9987	UP
HOXA5	3202	UP
HOXA6	3203	UP
HOXC10	3226	UP
HOXD10	3236	UP
HOXD11	3237	UP
HOXD3	3232	UP
HRASLS	57110	UP
HSD17B3	3293	UP
HSPA13	6782	UP
HSPA2	3306	UP
HSPA4	3308	UP
HSPA9	3313	UP
HSPB8	26353	UP
ICK	22858	UP
ID2	3398	UP
ID3	3399	UP
ID4	3400	UP
IFFO1	25900	UP
IFRD1	3475	UP
IFT81	28981	UP
IGFBP5	3488	UP
IKBKB	3551	UP
IL11RA	3590	UP
IL33	90865	UP
ILF3	3609	UP
IMPA1	3612	UP
IMPACT	55364	UP
IPO9	55705	UP
IPP	3652	UP
IQCE	23288	UP
IRS2	8660	UP
ITGAV	3685	UP
ITM2B	9445	UP
ITM2C	81618	UP
ITPKB	3707	UP
JAKMIP2	9832	UP
JAM2	58494	UP
JAM3	83700	UP
JUND	3727	UP
KAL1	3730	UP
KAT2B	8850	UP
KCNAB1	7881	UP
KCNB1	3745	UP
KCNH2	3757	UP
KCNN2	3781	UP
KCNN3	3782	UP
KCNQ2	3785	UP
KCTD5	54442	UP
KCTD7	154881	UP
KDM3B	51780	UP
KHDRBS3	10656	UP
KHK	3795	UP
KIAA0141	9812	UP
KIAA0226	9711	UP
KIAA0355	9710	UP
KIAA0494	9813	UP
KIAA0495	57212	UP
KIAA0556	23247	UP
KIAA0562	9731	UP
KIF1A	547	UP
KIF1B	23095	UP
KIF5C	3800	UP
KLHDC10	23008	UP
KPNA1	3836	UP
KPNB1	3837	UP
KRIT1	889	UP
LAMP1	3916	UP
LARP6	55323	UP
LARS	51520	UP
LFNG	3955	UP
LHPP	64077	UP
LMF1	64788	UP
LMO3	55885	UP
LOC100170939	100170939	UP
LOC100286937 /// LOC100287164 /// RASA4	100286937	UP
LOC100287552	100287552	UP
LOC100287590	100287590	UP
LOC100288442 /// LOC339047 /// NPIP	100288442	UP
LOC100291393 /// SHC2	100291393	UP
LOC222070	222070	UP
LOC339047	339047	UP
LOC339290	339290	UP
LOC399491	399491	UP
LOC653562 /// SLC6A10P /// SLC6A8	386757	UP
LOC728392 /// NLRP1	22861	UP
LOX	4015	UP
LPHN1	22859	UP
LPHN3	23284	UP
LPIN1	23175	UP
LPL	4023	UP
LPPR2	64748	UP
LPPR4	9890	UP
LRIG1	26018	UP
LRP2BP	55805	UP
LRP4	4038	UP
LRRC48	83450	UP
LRRFIP2	9209	UP
LRRN3	54674	UP
LSAMP	4045	UP
LUC7L2	51631	UP
LY6G5C	80741	UP
LZTFL1	54585	UP
MAF	4094	UP
MAGI2	9863	UP
MAOB	4129	UP
MAP1A	4130	UP
MAP1B	4131	UP
MAP4	4134	UP
MAP4K3	8491	UP
MAP4K4	9448	UP
MAP6D1	79929	UP
MAP7	9053	UP
MAPRE1	22919	UP
MAPT	4137	UP
MARCH6	10299	UP
MARCKS	4082	UP
MATN2	4147	UP
MBOAT2	129642	UP
MBP	4155	UP
MCCC1	56922	UP
MCF2L	23263	UP
MEST	4232	UP
METTL2A /// METTL2B	339175	UP
METTL2B	55798	UP
METTL7A	25840	UP
MFAP3L	9848	UP
MFF	56947	UP
MIA3	375056	UP
MICALL2	79778	UP
MINA	84864	UP
MLC1	23209	UP
MLF1	4291	UP
MLH1	4292	UP
MOAP1	64112	UP
MOCS1	4337	UP
MOG	4340	UP
MPL	4352	UP
MPP2	4355	UP
MRPS14	63931	UP
MSX1	4487	UP
MT1F	4494	UP
MT1M	4499	UP
MT1X	4501	UP
MT3	4504	UP
MTCH1	23787	UP
MTHFD2L	441024	UP
MTMR4	9110	UP
MTUS1	57509	UP
MUT	4594	UP
MXRA7	439921	UP
MYBPC1	4604	UP
MYO10	4651	UP
MYO16	23026	UP
MYOT	9499	UP
NAA40	79829	UP
NACAD	23148	UP
NAP1L2	4674	UP
NAP1L3	4675	UP
NAT6	24142	UP
NAV2	89797	UP
NBEA	26960	UP
NBPF10	100132406	UP
NCAM1	4684	UP
NCKAP1	10787	UP
NCKIPSD	51517	UP
NCOA1	8648	UP
NCRNA00094	266655	UP
NDFIP1	80762	UP
NDRG2	57447	UP
NDRG4	65009	UP
NDUFA5	4698	UP
NEK4	6787	UP
NELF	26012	UP
NELL2	4753	UP
NFASC	23114	UP
NFIB	4781	UP
NGFRAP1	27018	UP
NISCH	11188	UP
NKX2-2	4821	UP
NLGN1	22871	UP
NLGN3	54413	UP
NLGN4X	57502	UP
NLK	51701	UP
NMB	4828	UP
NME5	8382	UP
NOL3	8996	UP
NOL7	51406	UP
NOTCH4	4855	UP
NOVA1	4857	UP
NPDC1	56654	UP
NPIP	9284	UP
NR2F1	7025	UP
NRCAM	4897	UP
NRG2	9542	UP
NRN1	51299	UP
NRXN2	9379	UP
NSFL1C	55968	UP
NTM	50863	UP
NTRK2	4915	UP
NUBPL	80224	UP
OGG1	4968	UP
OLFM1	10439	UP
OLIG2	10215	UP
OMG	4974	UP
OSBPL11	114885	UP
OSBPL1A	114876	UP
OSBPL2	9885	UP
OSGIN2	734	UP
P4HTM	54681	UP
PACRG	135138	UP
PACS2	23241	UP
PADI2	11240	UP
PAICS	10606	UP
PAIP2B	400961	UP
PALLD	23022	UP
PALM	5064	UP
PAMR1	25891	UP
PAN2	9924	UP
PAQR3	152559	UP
PAQR4	124222	UP
PAQR6	79957	UP
PARP3	10039	UP
PBX1	5087	UP
PCBP4	57060	UP
PCDH17	27253	UP
PCDH9	5101	UP
PCDHA1 /// PCDHA10 /// PCDHA11 /// PCDHA12 /// PCDHA13 /// PCDHA2 /// PCDHA3 /// PCDHA4 /// PCDHA5 /// PCDHA6 /// PCDHA7 /// PCDHA8 /// PCDHA9 /// PCDHAC1 /// PCDHAC2	56134	UP
PCDHGA1 /// PCDHGA10 /// PCDHGA11 /// PCDHGA12 /// PCDHGA2 /// PCDHGA3 /// PCDHGA4 /// PCDHGA5 /// PCDHGA6 /// PCDHGA7 /// PCDHGA8 /// PCDHGA9 /// PCDHGB1 /// PCDHGB2 /// PCDHGB3 /// PCDHGB4 /// PCDHGB5 /// PCDHGB6 /// PCDHGB7 /// PCDHGC3 /// PCDHGC4 /// PCDHGC5	26025	UP
PCMT1	5110	UP
PCNP	57092	UP
PCNXL2	80003	UP
PDAP1	11333	UP
PDE4DIP	9659	UP
PDE6B	5158	UP
PDE8B	8622	UP
PDIA2	64714	UP
PDK2	5164	UP
PDPN	10630	UP
PDXK	8566	UP
PDZD2	23037	UP
PDZRN3	23024	UP
PEA15	8682	UP
PEBP1	5037	UP
PEG3	5178	UP
PEG3 /// ZIM2	23619	UP
PEX1	5189	UP
PEX10	5192	UP
PEX11A	8800	UP
PFN2	5217	UP
PGAM2	5224	UP
PGAP1	80055	UP
PGAP2	27315	UP
PGRMC2	10424	UP
PHF1	5252	UP
PHLPP1	23239	UP
PIGG	54872	UP
PIGZ	80235	UP
PIK3C2A	5286	UP
PIK3R4	30849	UP
PINK1	65018	UP
PIP4K2B	8396	UP
PJA2	9867	UP
PKIA	5569	UP
PLA2G4C	8605	UP
PLCD1	5333	UP
PLEKHB1	58473	UP
PLOD2	5352	UP
PLP1	5354	UP
PLSCR4	57088	UP
PLTP	5360	UP
PLXNA3	55558	UP
PLXNB1	5364	UP
PLXNB3	5365	UP
PMP2	5375	UP
PMP22	5376	UP
PMS2 /// PMS2CL	441194	UP
PMS2L2	5380	UP
PMS2L3	5387	UP
PMS2L4	5382	UP
PNMA2	10687	UP
PNMAL1	55228	UP
PNN	5411	UP
POLD2	5425	UP
POLR3F	10621	UP
POM121 /// POM121C	100101267	UP
POMT1	10585	UP
PON2	5445	UP
PPAP2A	8611	UP
PPDPF	79144	UP
PPFIA1	8500	UP
PPIA	5478	UP
PPP2CB	5516	UP
PPP2R2B	5521	UP
PPP2R5B	5526	UP
PPP2R5C	5527	UP
PREPL	9581	UP
PRKD1	5587	UP
PRKRIP1	79706	UP
PRMT3	10196	UP
PRNP	5621	UP
PROS1	5627	UP
PRR5L	79899	UP
PRUNE2	158471	UP
PSEN2	5664	UP
PSMC2	5701	UP
PSMD12	5718	UP
PSMF1	9491	UP
PSPH	5723	UP
PTGDS	5730	UP
PTK2	5747	UP
PTN	5764	UP
PTP4A2	8073	UP
PTPN11	5781	UP
PTPRD	5789	UP
PTPRF	5792	UP
PTPRN2	5799	UP
PTPRO	5800	UP
PTPRZ1	5803	UP
PTTG1IP	754	UP
PURA	5813	UP
PWP1	11137	UP
PYGB	5834	UP
ProSAPiP1	9762	UP
QDPR	5860	UP
QKI	9444	UP
RAB22A	57403	UP
RAB28	9364	UP
RAB2A	5862	UP
RAB31	11031	UP
RAB3GAP1	22930	UP
RAB5A	5868	UP
RAB6B	51560	UP
RAB7A	7879	UP
RABGEF1	27342	UP
RABL2A /// RABL2B	11158	UP
RABL3	285282	UP
RABL5	64792	UP
RAC1	5879	UP
RALGPS1	9649	UP
RAMP1	10267	UP
RASL12	51285	UP
RASSF2	9770	UP
RBM15B	29890	UP
RBM3	5935	UP
RBM39	9584	UP
RDX	5962	UP
REEP1	65055	UP
REEP2	51308	UP
REEP5	7905	UP
RER1	11079	UP
RGN	9104	UP
RGS11	8786	UP
RGS12	6002	UP
RGS9	8787	UP
RHCE /// RHD	6006	UP
RHEB	6009	UP
RHOBTB3	22836	UP
RHOQ	23433	UP
RIMS3	9783	UP
RING1	6015	UP
RIPK2	8767	UP
RNASE4	6038	UP
RND2	8153	UP
RNF13	11342	UP
RNF130	55819	UP
RNF14	9604	UP
RNF208	727800	UP
RNF216	54476	UP
ROBO3	64221	UP
RPS6KA2	6196	UP
RRAGD	58528	UP
RRN3P1	730092	UP
RSL1D1	26156	UP
RTN3	10313	UP
RUFY3	22902	UP
S100B	6285	UP
SAFB2	9667	UP
SALL2	6297	UP
SAMD4A	23034	UP
SAP18	10284	UP
SARM1	23098	UP
SCAMP1	9522	UP
SCAMP4	113178	UP
SCAMP5	192683	UP
SCAP	22937	UP
SCAPER	49855	UP
SCG3	29106	UP
SCG5	6447	UP
SCGB1D2	10647	UP
SCHIP1	29970	UP
SCN3B	55800	UP
SCRG1	11341	UP
SCUBE2	57758	UP
SDC3	9672	UP
SDR39U1	56948	UP
SEC23B	10483	UP
SEC61G	23480	UP
SEMA3B	7869	UP
SEPP1	6414	UP
SEPT2	4735	UP
SEPT4	5414	UP
SEPT8	23176	UP
SERINC1	57515	UP
SERINC3	10955	UP
SETD4	54093	UP
SFRS5	6430	UP
SFRS6	6431	UP
SGCB	6443	UP
SH2B1	25970	UP
SH3BGR	6450	UP
SIK3	23387	UP
SIM2	6493	UP
SIPA1L1	26037	UP
SIRT3	23410	UP
SKP1	6500	UP
SLC11A2	4891	UP
SLC14A1	6563	UP
SLC16A1	6566	UP
SLC16A7	9194	UP
SLC1A3	6507	UP
SLC22A17	51310	UP
SLC22A5	6584	UP
SLC23A2	9962	UP
SLC25A20	788	UP
SLC25A36	55186	UP
SLC30A9	10463	UP
SLC35A5	55032	UP
SLC44A1	23446	UP
SLC48A1	55652	UP
SLC4A4	8671	UP
SLC6A1	6529	UP
SLC6A8	6535	UP
SLITRK3	22865	UP
SMA4 /// SMA5	11039	UP
SMARCA1	6594	UP
SMARCC2	6601	UP
SMARCD3	6604	UP
SMC5	23137	UP
SMEK2	57223	UP
SMOX	54498	UP
SNAP25	6616	UP
SNAPC5	10302	UP
SNN	8303	UP
SNRNP27	11017	UP
SNTB1	6641	UP
SNX1	6642	UP
SNX19	399979	UP
SNX24	28966	UP
SNX5	27131	UP
SOBP	55084	UP
SOD2	6648	UP
SOHLH2	54937	UP
SORBS1	10580	UP
SOX2	6657	UP
SOX9	6662	UP
SP2	6668	UP
SPAG16	79582	UP
SPAG8	26206	UP
SPAG9	9043	UP
SPARC	6678	UP
SPARCL1	8404	UP
SPATA2	9825	UP
SPATA20	64847	UP
SPEG	10290	UP
SPOP	8405	UP
SPP1	6696	UP
SPTAN1	6709	UP
SRD5A3	79644	UP
SRGAP3	9901	UP
SRI	6717	UP
SRPK2	6733	UP
SRR	63826	UP
SSPN	8082	UP
ST18	9705	UP
ST5	6764	UP
STC2	8614	UP
STK39	27347	UP
STX16	8675	UP
SUB1	10923	UP
SUN1	23353	UP
SUPT7L	9913	UP
SV2A	9900	UP
SYNJ2BP	55333	UP
SYT11	23208	UP
TADA2A	6871	UP
TADA3	10474	UP
TAF7	6879	UP
TATDN2	9797	UP
TBC1D5	9779	UP
TBC1D9B	23061	UP
TCEA2	6919	UP
TCEAL2	140597	UP
TCTA	6988	UP
TERF1	7013	UP
TEX2	55852	UP
TEX261	113419	UP
TF	7018	UP
THBS2	7058	UP
THRA	7067	UP
THSD7A	221981	UP
THTPA	79178	UP
THYN1	29087	UP
TIMM50	92609	UP
TIMP3	7078	UP
TIMP4	7079	UP
TJP2	9414	UP
TK2	7084	UP
TM9SF4	9777	UP
TMBIM6	7009	UP
TMCC1	23023	UP
TMEM106B	54664	UP
TMEM111	55831	UP
TMEM120B	144404	UP
TMEM144	55314	UP
TMEM168	64418	UP
TMEM176B	28959	UP
TMEM184C	55751	UP
TMEM22	80723	UP
TMEM231	79583	UP
TMEM66	51669	UP
TMEM80	283232	UP
TMEM90B	79953	UP
TMEM9B	56674	UP
TMX2	51075	UP
TMX4	56255	UP
TNFRSF21	27242	UP
TNIK	23043	UP
TNKS	8658	UP
TNPO1	3842	UP
TNPO2	30000	UP
TNS1	7145	UP
TPPP3	51673	UP
TPST1	8460	UP
TRAK2	66008	UP
TRIM2	23321	UP
TRIM52	84851	UP
TRIM9	114088	UP
TRO	7216	UP
TROVE2	6738	UP
TRPC1	7220	UP
TRPS1	7227	UP
TSC22D1	8848	UP
TSC22D2	9819	UP
TSC22D4	81628	UP
TSEN2	80746	UP
TSNAXIP1	55815	UP
TSPAN3	10099	UP
TSPAN7	7102	UP
TSPYL4	23270	UP
TTC30A	92104	UP
TTYH1	57348	UP
TUBB2B	347733	UP
TUBG2	27175	UP
TUBGCP3	10426	UP
TXNIP	10628	UP
UBA5	79876	UP
UBE2D4	51619	UP
UBE2I	7329	UP
UBL3	5412	UP
UCHL1	7345	UP
UCN	7349	UP
UFM1	51569	UP
UNC119B	84747	UP
UPF3A	65110	UP
USP46	64854	UP
UST	10090	UP
VAMP3	9341	UP
VAPB	9217	UP
VCAN	1462	UP
VEGFA	7422	UP
VEZF1	7716	UP
VGLL4	9686	UP
VIPR2	7434	UP
VPS13B	157680	UP
VPS13D	55187	UP
WASF3	10810	UP
WASL	8976	UP
WDFY3	23001	UP
WDR19	57728	UP
WDR45L	56270	UP
WDR5B	54554	UP
WDR6	11180	UP
WDR60	55112	UP
WDR7	23335	UP
WIPF2	147179	UP
WLS	79971	UP
WNT5A	7474	UP
WRB	7485	UP
WWOX	51741	UP
WWTR1	25937	UP
XPC	7508	UP
YEATS2	55689	UP
YTHDF1	54915	UP
ZBTB20	26137	UP
ZBTB22	9278	UP
ZC3H14	79882	UP
ZDHHC11	79844	UP
ZDHHC17	23390	UP
ZEB2	9839	UP
ZFP2	80108	UP
ZFYVE16	9765	UP
ZHX2	22882	UP
ZHX3	23051	UP
ZKSCAN1	7586	UP
ZKSCAN5	23660	UP
ZMAT3	64393	UP
ZMYM4	9202	UP
ZNF107	51427	UP
ZNF167	55888	UP
ZNF177	7730	UP
ZNF187	7741	UP
ZNF204P	7754	UP
ZNF238	10472	UP
ZNF271	10778	UP
ZNF287	57336	UP
ZNF3	7551	UP
ZNF302	55900	UP
ZNF334	55713	UP
ZNF337	26152	UP
ZNF34	80778	UP
ZNF395	55893	UP
ZNF415	55786	UP
ZNF510	22869	UP
ZNF532	55205	UP
ZNF536	9745	UP
ZNF606	80095	UP
ZNF767	79970	UP
ZNF783	155060	UP
ZNF83	55769	UP
ZNF862	643641	UP
ZSCAN12	9753	UP
ZSCAN18	65982	UP
