# Supplementary material for: Age-Specific Signatures of Glioblastoma at the Genomic, Genetic, and Epigenetic Levels
Source: PLoS One. 2013 Apr 29;8(4):e62982. doi: 10.1371/journal.pone.0062982 (PMC3639162; doi:10.1371/journal.pone.0062982)
Supplement: Table S7 — List of differentially methylated genes that are polycomb group protein target genes. (XLSX) [file pone.0062982.s010.xlsx]

## Sheet: Sup Table 7
Supplementary Table 7. List of differentially methylated genes that are polycomb group protein target genes.
ACTL6B
BMP8A
FBN2
FOXC1
FOXE3
GCM2
GDA
GPR6
KCNC4
KIAA0980
KLF14
MLNR
NEF3
NPTX2
PENK
SFRP1
SLC10A4
