# Supplementary material for: Age-Specific Signatures of Glioblastoma at the Genomic, Genetic, and Epigenetic Levels
Source: PLoS One. 2013 Apr 29;8(4):e62982. doi: 10.1371/journal.pone.0062982 (PMC3639162; doi:10.1371/journal.pone.0062982)
Supplement: Table S8 — List of genes that undergo hypermethylation only in GBMs. (XLSX) [file pone.0062982.s011.xlsx]

## Sheet: Sup Table 8
Supplementary Table 8. List of genes that undergo hypermethylation only in GBMs.
Hypermethylated in old	Hypermethylated in young
ABO	CD59
ADCY5	NCOA2
ADRA1D	TENC1
ADRB3	VAMP5
AFG3L1
AP3M2
ATP8A2
BARHL2
BCL2
BNC1
BOLL
BTG4
C12orf40
C14orf39
C1orf35
C20orf133
C21orf81
CABYR
CASP2
CCDC60
CD47
CD55
CDKL2
CHMP4C
CMTM8
CNTNAP3
CRMP1
CXCL6
CYB5R3
D4S234E
DAPK1
DDX24
DDX43
DIRAS3
DKFZp434I1020
DLK1
DLX5
DMN
DOCK5
EBPL
ECGF1
EFCAB1
EGFL9
ESPN
FERD3L
FLJ10260
FLJ39370
FLJ39599
FLJ44216
FZD6
GABRB2
GABRE
GAS6
GATA4
GDA
GNG4
GPATC1
GPR143
GPR6
GPR78
GPR83
HCN1
HHEX
HIST1H2AK
HIST1H2BI
HIST1H3D
HLA-G
HMOX2
HNMT
HOXA9
HOXD10
HOXD11
HOXD13
HOXD3
HSPA2
IFI27
IRF8
IRX2
ITGA8
ITM2A
JAK1
KCNH1
KCNV1
KHDRBS2
KIAA1944
KRTAP4-2
LDHC
LOC389458
LOC400451
LOC51334
LRFN5
LRRC3
LRRC39
MEG3
MLNR
MRPL41
MSC
MTNR1B
MXRA5
MYO1B
MYOCD
NBPF3
NCL
NHLRC1
NIPSNAP3B
NKD2
NKX6-1
NMUR1
NOL10
NPY
NUCB1
OCLN
OR2L13
PABPC5
PALM2-AKAP2
PARP9
PCDHB4
PCSK6
PGCP
PGGT1B
PKP2
PLEKHH2
PMCHL2
POGZ
PPARG
PPIE
PRKCB1
PRKCH
PTPN18
PTTG1IP
RAB6A
RAB8A
RASGEF1A
RASGRF1
RB1
RBP7
RDHE2
RPIB9
RPL26L1
RPL36
RUNX3
RYR2
SAMD8
SKIP
SLC25A21
SLC27A6
SLC35F3
SLC5A7
SLC6A20
SLC9A3
SLIT2
SMN2
SNAI1
SNRPN
SNX10
SOCS3
SPIN
SRD5A2
SSTR1
SSTR4
ST8SIA2
SULT1A1
SULT4A1
SYT10
TCF12
THBD
TINP1
TMEM74
TOLLIP
TP53TG3
TPRKB
TRPC6
TSCOT
TWSG1
VHL
VRK2
WBSCR17
WDR52
WDR69
ZCCHC13
ZFP42
ZNF560
ZNF681
ZP3
