# Supplementary material for: Age-Specific Signatures of Glioblastoma at the Genomic, Genetic, and Epigenetic Levels
Source: PLoS One. 2013 Apr 29;8(4):e62982. doi: 10.1371/journal.pone.0062982 (PMC3639162; doi:10.1371/journal.pone.0062982)
Supplement: Table S9 — List of differentially methylated genes that have been reported to undergo hypermethylation in cancer in Pubmeth database. (XLSX) [file pone.0062982.s012.xlsx]

## Sheet: Sup Table 9
Supplementary Table 9. List of differentially methylated genes that have been reported to undergo hypermethylation in cancer in Pubmeth database.
BCL2
DAPK1
DIRAS3
GATA4
HLA-A
HOXA9
HOXD11
ITGA8
PCSK6
RASGRF1
RB1
RUNX3
SLIT2
SNAI1
SOCS3
SULT1A1
THBD
VHL
