# Supplementary material for: Age-Specific Signatures of Glioblastoma at the Genomic, Genetic, and Epigenetic Levels
Source: PLoS One. 2013 Apr 29;8(4):e62982. doi: 10.1371/journal.pone.0062982 (PMC3639162; doi:10.1371/journal.pone.0062982)
Supplement: Table S10 — List of genes that are differentially expressed (Agilent and Affymetrix U133A platforms) and methylated with respect to age. (XLSX) [file pone.0062982.s013.xlsx]

## Sheet: Sup Table 10
Supplementary Table 10. List of genes that are differentially expressed (Agilent and Affymetrix U133A platforms) and methylated with respect to age.
CRMP1
DLK1
FZD6
HOXD10
HOXD3
MSC
MYO1B
PRKCB1
PTTG1IP
SLC25A21
VRK2
