# Supplementary material for: Age-Specific Signatures of Glioblastoma at the Genomic, Genetic, and Epigenetic Levels
Source: PLoS One. 2013 Apr 29;8(4):e62982. doi: 10.1371/journal.pone.0062982 (PMC3639162; doi:10.1371/journal.pone.0062982)
Supplement: Table S12 — Pearson and Spearman Rank Correlation between HHEX and VEGFA expression on Affymetrix U133A, Agilent G4502A, and Affymetrix Human Exon platforms. For all correlations, p-values are significant (p≤0.05) (XLSX) [file pone.0062982.s015.xlsx]

## Sheet: Sup Table 12
Supplementary Table 12. Pearson and Spearman Rank Correlation between HHEX and VEGFA expression on Affymetrix U133A, Agilent G4502A, and Affymetrix Human Exon platforms. For all correlations, p-values are significant (p < 0.005)
	U133A	Agilent	Exon
Pearson	-0.141426	-0.242463	-0.249999
Spearman	-0.138051	-0.249754	-0.260347
