# Supplementary material for: Age-Specific Signatures of Glioblastoma at the Genomic, Genetic, and Epigenetic Levels
Source: PLoS One. 2013 Apr 29;8(4):e62982. doi: 10.1371/journal.pone.0062982 (PMC3639162; doi:10.1371/journal.pone.0062982)
Supplement: Table S13 — List of genes that are (a) deleted and downregulated (b) amplified and upregulated in the old group. DAGs are computed from SNP 6 platform. DEGs are the intersection of genes found in Affymetrix U133A and Agilent G4502A platforms. (XLSX) [file pone.0062982.s016.xlsx]

## Sheet: Sup Table 13
Supplementary Table 13. List of genes that are (a) deleted and downregulated (b) amplified and upregulated in the old group. DAGs are computed from SNP 6 platform. DEGs are the intersection of genes found in Affymetrix U133A and Agilent G4502A platforms.
a) Downregulated and deleted in Old	b) Upregulated and amplified in old
a)	b)
RPP30	DPP6
YME1L1	EGFR
COX15	CLEC5A
CREM	HIPK2
KIN	PEX1
GTPBP4	GATAD1
GDI2	TPST1
PDCD4
HPS1
IDE
ATP5C1
DHX32
PTEN
SVIL
ECHDC3
OBFC1
PRPF18
CDC123
PDLIM1
BUB3
PTER
