# Supplementary material for: Age-Specific Signatures of Glioblastoma at the Genomic, Genetic, and Epigenetic Levels
Source: PLoS One. 2013 Apr 29;8(4):e62982. doi: 10.1371/journal.pone.0062982 (PMC3639162; doi:10.1371/journal.pone.0062982)
Supplement: Table S14 — List of enriched motifs in the promoter regions of the differentially expressed genes appear in both Affymetrix U133A and Agilent G4502A platforms. FDR(BH): Benjamini-Hochberg FDR value (XLSX) [file pone.0062982.s017.xlsx]

## Sheet: Sup Table 14
Supplementary Table 14. List of enriched motifs in the promoter regions of the differentially expressed genes appear in both Affymetrix U133A and Agilent G4502A platforms. FDR(BH): Benjamini-Hochberg FDR value
TF Motif	FDR(BH)
Egr1	0.0025
INSM1	0.003
MZF1_1-4	0.0157
PLAG1	0.0157
CTCF	0.0226
TFAP2A	0.0241
Mycn	0.0241
SP1	0.0241
Myc	0.0284
HIF1A::ARNT	0.0437
