# Supplementary material for: Age-Specific Signatures of Glioblastoma at the Genomic, Genetic, and Epigenetic Levels
Source: PLoS One. 2013 Apr 29;8(4):e62982. doi: 10.1371/journal.pone.0062982 (PMC3639162; doi:10.1371/journal.pone.0062982)
Supplement: Table S15 — GSEA results on old vs. young genes. NES: normalized enrichment score. Gene sets with negative (positive) enrichment scores are active in young (old) group. (XLSX) [file pone.0062982.s018.xlsx]

## Sheet: Sup Table 15
Supplementary Table 15. GSEA results on old vs. young genes. NES: normalized enrichment score. Gene sets with negative (positive) enrichment scores are active in young (old) group.
Gene Set	Annotation	Size	NES	p
REACTOME_GLYCOLYSIS	Carbyhydrate metabolism	18	1.68	0.03
REACTOME_GLUCAGON_SIGNALING_IN_METABOLIC_REGULATION	Carbyhydrate metabolism	22	1.53	0.05
ELVIDGE_HIF1A_AND_HIF2A_TARGETS_DN	Hypoxia	85	1.77	0.02
ELVIDGE_HIF1A_TARGETS_DN	Hypoxia	75	1.83	0.02
MENSE_HYPOXIA_UP	Hypoxia	70	1.66	0.04
SEMENZA_HIF1_TARGETS	Hypoxia	31	1.63	0.05
BIOCARTA_MCALPAIN_PATHWAY	Invasion	17	1.62	0.03
SOTIRIOU_BREAST_CANCER_GRADE_1_VS_3_DN	Advanced tumor	46	1.85	0.01
COLIN_PILOCYTIC_ASTROCYTOMA_VS_GLIOBLASTOMA_DN	Advanced tumor	25	1.53	0.07
MOLENAAR_TARGETS_OF_CCND1_AND_CDK4_DN	Cell cycle	35	-1.59	0.05
GRAHAM_CML_QUIESCENT_VS_NORMAL_QUIESCENT_UP	Cell cycle	80	-1.64	0.03
CHANG_CYCLING_GENES	Cell cycle	33	-1.72	0.03
ST_P38_MAPK_PATHWAY	MAPK	32	-1.71	0.01
KIM_MYCN_AMPLIFICATION_TARGETS_UP	MYC	49	-1.61	0.01
YU_MYC_TARGETS_UP	MYC	31	-1.65	0.04
SHEPARD_BMYB_TARGETS	Bmyb	47	-1.67	0.02
ROVERSI_GLIOMA_COPY_NUMBER_DN	Glioma	36	-1.82	0
MUELLER_METHYLATED_IN_GLIOBLASTOMA	Glioma	28	-1.68	0.02
ELVIDGE_HYPOXIA_BY_DMOG_DN	Hypoxia	54	-1.71	0.02
ST_TUMOR_NECROSIS_FACTOR_PATHWAY	TNF signaling	26	-1.61	0.05
YAMASHITA_LIVER_CANCER_WITH_EPCAM_UP	Premalignant	44	-1.67	0.04
YAMASHITA_LIVER_CANCER_STEM_CELL_UP	Stem cell	37	-1.69	0.02
LIANG_HEMATOPOIESIS_STEM_CELL_NUMBER_LARGE_VS_TINY_DN	Stem cell	30	-1.49	0.05
REACTOME_TRANSLATION_INITIATION_COMPLEX_FORMATION	Translation	41	-1.84	0.03
