# Supplementary material for: Age-Specific Signatures of Glioblastoma at the Genomic, Genetic, and Epigenetic Levels
Source: PLoS One. 2013 Apr 29;8(4):e62982. doi: 10.1371/journal.pone.0062982 (PMC3639162; doi:10.1371/journal.pone.0062982)
Supplement: Table S16 — DAVID analysis results on age-specific upregulated genes in old that appear in Affymetrix U133A and Agilent G4502A data sets. Fisher's exact test p-value<0.05 (XLS) [file pone.0062982.s019.xls]

## Sheet: Sup Table 16
Supplementary Table 16. DAVID analysis results on age-specific upregulated genes in old that appear in Affymetrix U133A and Agilent G4502A data sets. Fisher's exact test p-value < 0.05
Category	Term	Count	%	Pvalue (Fisher's Exact Test)	Genes (Entrez Gene ID)
SP_PIR_KEYWORDS	alternative splicing	122	53.0435	9.39319e-06	22871, 80741, 8675, 9924, 55184, 2339, 10297, 11158, 2202, 6493, 9639, 9444, 80224, 9542, 8310, 4891, 79899, 875, 23061, 11147, 6604, 11083, 9053, 26206, 5414, 55314, 135138, 9885, 2628, 5352, 27315, 28996, 1501, 7422, 51308, 2273, 54937, 79970, 6584, 54681, 1462, 3795, 23114, 23390, 114088, 5158, 10079, 131544, 57758, 9765, 1837, 51310, 4857, 4147, 50649, 25891, 23176, 9413, 9414, 55815, 9201, 9…
UP_SEQ_FEATURE	splice variant	122	53.0435	1.06863e-05	22871, 80741, 8675, 9924, 55184, 2339, 10297, 11158, 2202, 6493, 9639, 9444, 80224, 9542, 8310, 4891, 79899, 875, 23061, 11147, 6604, 11083, 9053, 26206, 5414, 55314, 135138, 9885, 2628, 5352, 27315, 28996, 1501, 7422, 51308, 2273, 54937, 79970, 6584, 54681, 1462, 3795, 23114, 23390, 114088, 5158, 10079, 131544, 57758, 9765, 1837, 51310, 4857, 4147, 50649, 25891, 23176, 9413, 9414, 55815, 9201, 9…
GOTERM_BP_FAT	GO:0048666~neuron development	15	6.52174	6.55328e-05	3730, 6648, 582, 7869, 1956, 50863, 22865, 7349, 9201, 7422, 3236, 1462, 80303, 23114, 4915
GOTERM_BP_FAT	GO:0030182~neuron differentiation	17	7.3913	8.43577e-05	3730, 6648, 582, 7869, 1956, 50863, 22865, 10215, 7349, 9201, 7422, 3399, 3236, 80303, 1462, 23114, 4915
SP_PIR_KEYWORDS	phosphoprotein	111	48.2609	0.000741799	79706, 8675, 9924, 2339, 6566, 9639, 9444, 5224, 8404, 4291, 3551, 9542, 8310, 1983, 4891, 30, 875, 26353, 23061, 6604, 11083, 9053, 5414, 55112, 2768, 2628, 8382, 5352, 28996, 1842, 1501, 6584, 93973, 5962, 1462, 3795, 23114, 23390, 9770, 23321, 2632, 114088, 150726, 10079, 5621, 7434, 114885, 9765, 1837, 4857, 4147, 23176, 9413, 9414, 9825, 9201, 9491, 8165, 54664, 158471, 8500, 80003, 55914, 5…
GOTERM_BP_FAT	GO:0010035~response to inorganic substance	10	4.34783	0.000884748	1261, 4891, 5224, 6648, 1956, 2628, 3795, 2339, 6529, 5621
GOTERM_BP_FAT	GO:0010038~response to metal ion	8	3.47826	0.000981661	1261, 4891, 5224, 1956, 2628, 3795, 6529, 5621
SP_PIR_KEYWORDS	developmental protein	21	9.13043	0.000994823	9444, 3202, 23237, 4291, 10215, 8382, 4487, 9825, 55815, 9201, 1808, 1501, 7422, 2273, 54937, 64847, 57447, 3236, 3232, 4915, 6493
SP_PIR_KEYWORDS	disease mutation	34	14.7826	0.00113908	1956, 7869, 6535, 5352, 9414, 5376, 5189, 2273, 3757, 6566, 6584, 3236, 3795, 5962, 2202, 3730, 9639, 1261, 27034, 2632, 5224, 4137, 582, 5158, 2670, 4487, 5621, 24142, 4891, 8787, 875, 26353, 1837, 56922
GOTERM_BP_FAT	GO:0001666~response to hypoxia	8	3.47826	0.00122589	4891, 6648, 7422, 230, 664, 5352, 8996, 112399
SP_PIR_KEYWORDS	differentiation	15	6.52174	0.00124374	9444, 4291, 8382, 9825, 28959, 9201, 1808, 55815, 2273, 54937, 7422, 64847, 57447, 4915, 6493
GOTERM_BP_FAT	GO:0043066~negative regulation of apoptosis	13	5.65217	0.00127095	6648, 1956, 3551, 8382, 664, 2339, 665, 4487, 5621, 27315, 28996, 7422, 8996
GOTERM_BP_FAT	GO:0043069~negative regulation of programmed cell death	13	5.65217	0.00143163	6648, 1956, 3551, 8382, 664, 2339, 665, 4487, 5621, 27315, 28996, 7422, 8996
GOTERM_BP_FAT	GO:0060548~negative regulation of cell death	13	5.65217	0.0014657	6648, 1956, 3551, 8382, 664, 2339, 665, 4487, 5621, 27315, 28996, 7422, 8996
GOTERM_BP_FAT	GO:0070482~response to oxygen levels	8	3.47826	0.00164508	4891, 6648, 7422, 230, 664, 5352, 8996, 112399
GOTERM_CC_FAT	GO:0043005~neuron projection	12	5.21739	0.00233008	1808, 23237, 4137, 5792, 358, 230, 23114, 664, 4915, 7349, 6529, 1400
GOTERM_CC_FAT	GO:0030424~axon	8	3.47826	0.00269185	1808, 4137, 358, 230, 23114, 4915, 7349, 6529
GOTERM_CC_FAT	GO:0042995~cell projection	18	7.82609	0.00332493	1261, 23237, 4137, 5792, 582, 50649, 230, 2768, 664, 7349, 6529, 1400, 1808, 358, 6584, 5962, 23114, 4915
GOTERM_BP_FAT	GO:0006916~anti-apoptosis	9	3.91304	0.00368154	27315, 6648, 7422, 3551, 8382, 664, 8996, 665, 5621
GOTERM_BP_FAT	GO:0006979~response to oxidative stress	8	3.47826	0.00383467	4891, 8455, 6648, 1956, 2628, 7349, 9962, 5621
GOTERM_BP_FAT	GO:0031175~neuron projection development	10	4.34783	0.00402094	9201, 3730, 7869, 1956, 582, 22865, 80303, 1462, 23114, 7349
GOTERM_BP_FAT	GO:0050804~regulation of synaptic transmission	7	3.04348	0.00623968	23237, 1501, 22871, 1956, 4915, 7349, 6529
INTERPRO	IPR013098:Immunoglobulin I-set	7	3.04348	0.0082939	26018, 5792, 50863, 9848, 23114, 4915, 9542
GOTERM_BP_FAT	GO:0042981~regulation of apoptosis	19	8.26087	0.0087078	6648, 1956, 5792, 50649, 3551, 8382, 664, 7349, 2339, 665, 4487, 5621, 27315, 4891, 28996, 7422, 3399, 158471, 8996
GOTERM_BP_FAT	GO:0051969~regulation of transmission of nerve impulse	7	3.04348	0.00898806	23237, 1501, 22871, 1956, 4915, 7349, 6529
BIOCARTA	h_prionPathway:Prion Pathway	3	1.30435	0.00952151	2670, 333, 5621
GOTERM_BP_FAT	GO:0043067~regulation of programmed cell death	19	8.26087	0.00958887	6648, 1956, 5792, 50649, 3551, 8382, 664, 7349, 2339, 665, 4487, 5621, 27315, 4891, 28996, 7422, 3399, 158471, 8996
GOTERM_BP_FAT	GO:0010941~regulation of cell death	19	8.26087	0.00993722	6648, 1956, 5792, 50649, 3551, 8382, 664, 7349, 2339, 665, 4487, 5621, 27315, 4891, 28996, 7422, 3399, 158471, 8996
GOTERM_MF_FAT	GO:0005372~water transporter activity	3	1.30435	0.0106401	358, 6563, 361
GOTERM_BP_FAT	GO:0031644~regulation of neurological system process	7	3.04348	0.0107648	23237, 1501, 22871, 1956, 4915, 7349, 6529
GOTERM_MF_FAT	GO:0008017~microtubule binding	5	2.17391	0.0116959	79929, 10297, 4137, 2339, 5621
GOTERM_CC_FAT	GO:0005578~proteinaceous extracellular matrix	10	4.34783	0.0131848	3730, 4147, 1842, 7422, 55914, 8404, 333, 1462, 2202, 4015
GOTERM_BP_FAT	GO:0010033~response to organic substance	17	7.3913	0.0142033	1261, 114, 3300, 1956, 230, 2628, 7349, 2339, 4487, 6529, 9414, 8787, 358, 3399, 3795, 401251, 4015
GOTERM_BP_FAT	GO:0030030~cell projection organization	11	4.78261	0.0142723	9201, 3730, 7869, 1956, 582, 22865, 5962, 80303, 1462, 23114, 7349
INTERPRO	IPR006620:Prolyl 4-hydroxylase, alpha subunit	3	1.30435	0.0150413	54681, 5352, 112399
GOTERM_BP_FAT	GO:0006833~water transport	3	1.30435	0.0156798	358, 6563, 361
SMART	SM00702:P4Hc	3	1.30435	0.0162573	54681, 5352, 112399
UP_SEQ_FEATURE	domain:CUB	3	1.30435	0.0171258	57758, 8455, 25891
UP_SEQ_FEATURE	binding site:GTP	3	1.30435	0.0171258	51560, 5414, 23176
GOTERM_BP_FAT	GO:0042044~fluid transport	3	1.30435	0.0176304	358, 6563, 361
INTERPRO	IPR005123:Oxoglutarate and iron-dependent oxygenase	3	1.30435	0.0191619	54681, 5352, 112399
INTERPRO	IPR003659:Plexin/semaphorin/integrin	4	1.73913	0.0192418	754, 8455, 7869, 5365
SP_PIR_KEYWORDS	egf-like domain	8	3.47826	0.0200278	57758, 4147, 8455, 25891, 1462, 9542, 2202, 460
GOTERM_CC_FAT	GO:0031012~extracellular matrix	10	4.34783	0.0204949	3730, 4147, 1842, 7422, 55914, 8404, 333, 1462, 2202, 4015
SP_PIR_KEYWORDS	vitamin c	3	1.30435	0.0209496	54681, 5352, 112399
SMART	SM00423:PSI	4	1.73913	0.0213573	754, 8455, 7869, 5365
GOTERM_MF_FAT	GO:0019842~vitamin binding	6	2.6087	0.0218	64850, 875, 54681, 5352, 112399, 56922
GOTERM_BP_FAT	GO:0051966~regulation of synaptic transmission, glutamatergic	3	1.30435	0.0218204	1956, 4915, 7349
UP_SEQ_FEATURE	compositionally biased region:Poly-Gly	9	3.91304	0.0218288	9762, 7869, 22865, 23258, 150726, 8500, 3781, 10215, 3232
UP_SEQ_FEATURE	sequence variant	159	69.1304	0.0221835	79706, 9924, 5376, 10297, 6566, 6563, 2202, 6493, 9444, 9639, 7485, 5224, 51011, 26152, 4291, 8404, 80224, 3488, 3551, 5365, 9737, 8310, 4891, 1983, 79899, 10090, 30, 875, 26353, 10810, 23061, 112399, 6604, 56922, 11083, 9053, 26206, 5414, 55314, 2768, 55112, 2628, 5352, 28996, 1842, 54937, 2273, 1501, 79970, 3399, 6584, 93973, 1462, 5962, 3795, 23114, 4015, 23390, 9770, 1261, 3730, 2632, 114088,…
GOTERM_BP_FAT	GO:0032989~cellular component morphogenesis	11	4.78261	0.0228821	9201, 3730, 55914, 7869, 1956, 582, 22865, 1462, 23114, 5376, 9053
GOTERM_BP_FAT	GO:0045664~regulation of neuron differentiation	6	2.6087	0.0229088	4974, 22871, 4137, 5792, 3232, 4915
GOTERM_BP_FAT	GO:0042391~regulation of membrane potential	6	2.6087	0.0235714	9444, 6648, 3757, 10215, 664, 5376
GOTERM_BP_FAT	GO:0040007~growth	7	3.04348	0.024079	9201, 3202, 2273, 55914, 582, 2628, 3488
INTERPRO	IPR010548:BNIP3	2	0.869565	0.025172	664, 665
GOTERM_CC_FAT	GO:0030426~growth cone	4	1.73913	0.0254124	1808, 4137, 5792, 4915
UP_SEQ_FEATURE	domain:Fe2OG dioxygenase	3	1.30435	0.0256332	54681, 5352, 112399
PIR_SUPERFAMILY	PIRSF010075:human E1B 19K/Bcl-2-interacting protein Nip3	2	0.869565	0.0257932	664, 665
GOTERM_BP_FAT	GO:0006497~protein amino acid lipidation	4	1.73913	0.0263392	27315, 79929, 2339, 23390
GOTERM_MF_FAT	GO:0015293~symporter activity	6	2.6087	0.0266015	4891, 6566, 6584, 6535, 6529, 9962
GOTERM_CC_FAT	GO:0030427~site of polarized growth	4	1.73913	0.0266531	1808, 4137, 5792, 4915
GOTERM_MF_FAT	GO:0031418~L-ascorbic acid binding	3	1.30435	0.0268744	54681, 5352, 112399
GOTERM_BP_FAT	GO:0007610~behavior	12	5.21739	0.0276634	3730, 4857, 114, 28996, 6648, 1501, 582, 3236, 4915, 7349, 6529, 460
GOTERM_BP_FAT	GO:0000902~cell morphogenesis	10	4.34783	0.0295241	9201, 3730, 55914, 7869, 1956, 582, 22865, 1462, 23114, 9053
GOTERM_BP_FAT	GO:0048858~cell projection morphogenesis	8	3.47826	0.0298003	9201, 3730, 7869, 1956, 582, 22865, 1462, 23114
SP_PIR_KEYWORDS	neurogenesis	6	2.6087	0.0301436	9201, 1808, 57447, 4915, 6604, 6493
GOTERM_BP_FAT	GO:0042158~lipoprotein biosynthetic process	4	1.73913	0.0332168	27315, 79929, 2339, 23390
GOTERM_MF_FAT	GO:0048037~cofactor binding	8	3.47826	0.0336214	8310, 27034, 5224, 64850, 11062, 875, 10840, 23410
GOTERM_MF_FAT	GO:0032403~protein complex binding	7	3.04348	0.0336759	4891, 1842, 55914, 8787, 5792, 5189, 23026
GOTERM_BP_FAT	GO:0042461~photoreceptor cell development	3	1.30435	0.0338601	7422, 582, 4915
GOTERM_MF_FAT	GO:0015631~tubulin binding	5	2.17391	0.0343563	79929, 10297, 4137, 2339, 5621
GOTERM_BP_FAT	GO:0044057~regulation of system process	9	3.91304	0.034682	23237, 1501, 22871, 3757, 1956, 6584, 4915, 7349, 6529
UP_SEQ_FEATURE	repeat:LRR 14	4	1.73913	0.0348675	26018, 1842, 55914, 22865
GOTERM_BP_FAT	GO:0032990~cell part morphogenesis	8	3.47826	0.0365018	9201, 3730, 7869, 1956, 582, 22865, 1462, 23114
GOTERM_BP_FAT	GO:0046530~photoreceptor cell differentiation	3	1.30435	0.0365168	7422, 582, 4915
INTERPRO	IPR000742:EGF-like, type 3	7	3.04348	0.0372858	57758, 4147, 8455, 25891, 1462, 9542, 2202
UP_SEQ_FEATURE	repeat:ARM 6	3	1.30435	0.038162	25852, 10297, 1501
GOTERM_BP_FAT	GO:0051789~response to protein stimulus	5	2.17391	0.0411136	3300, 3399, 2339, 4487, 401251
GOTERM_BP_FAT	GO:0048667~cell morphogenesis involved in neuron differentiation	7	3.04348	0.0419505	9201, 3730, 7869, 582, 22865, 1462, 23114
GOTERM_CC_FAT	GO:0030425~dendrite	6	2.6087	0.0430277	1808, 23237, 664, 4915, 7349, 1400
INTERPRO	IPR006210:EGF-like	7	3.04348	0.0430793	57758, 4147, 8455, 25891, 1462, 9542, 460
SP_PIR_KEYWORDS	Symport	5	2.17391	0.0431652	6566, 6584, 6535, 6529, 9962
SP_PIR_KEYWORDS	dioxygenase	4	1.73913	0.0436042	8424, 54681, 5352, 112399
GOTERM_CC_FAT	GO:0031225~anchored to membrane	7	3.04348	0.0451743	4974, 51560, 5158, 50863, 2768, 8605, 5621
GOTERM_BP_FAT	GO:0007155~cell adhesion	15	6.52174	0.0451966	3730, 55914, 22871, 5792, 1956, 50863, 333, 460, 4974, 1842, 1501, 5101, 8500, 1462, 23114
GOTERM_BP_FAT	GO:0048812~neuron projection morphogenesis	7	3.04348	0.0453383	9201, 3730, 7869, 1956, 22865, 1462, 23114
GOTERM_BP_FAT	GO:0022610~biological adhesion	15	6.52174	0.045644	3730, 55914, 22871, 5792, 1956, 50863, 333, 460, 4974, 1842, 1501, 5101, 8500, 1462, 23114
GOTERM_BP_FAT	GO:0046395~carboxylic acid catabolic process	5	2.17391	0.0460035	8310, 27034, 30, 875, 56922
GOTERM_BP_FAT	GO:0016054~organic acid catabolic process	5	2.17391	0.0460035	8310, 27034, 30, 875, 56922
SP_PIR_KEYWORDS	brain	3	1.30435	0.0460535	230, 6535, 5621
GOTERM_CC_FAT	GO:0060076~excitatory synapse	2	0.869565	0.0461265	5792, 4915
UP_SEQ_FEATURE	repeat:ARM 5	3	1.30435	0.0465815	25852, 10297, 1501
INTERPRO	IPR003598:Immunoglobulin subtype 2	7	3.04348	0.04662	26018, 5792, 50863, 9848, 23114, 4915, 9542
GOTERM_MF_FAT	GO:0016702~oxidoreductase activity, acting on single donors with incorporation of molecular oxygen, incorporation of two atoms of oxygen	4	1.73913	0.0471083	8424, 54681, 5352, 112399
GOTERM_CC_FAT	GO:0043025~cell soma	6	2.6087	0.0479058	1808, 5792, 358, 4915, 7349, 1400
GOTERM_MF_FAT	GO:0004157~dihydropyrimidinase activity	2	0.869565	0.0481	1808, 1400
GOTERM_MF_FAT	GO:0016701~oxidoreductase activity, acting on single donors with incorporation of molecular oxygen	4	1.73913	0.0488884	8424, 54681, 5352, 112399
SP_PIR_KEYWORDS	spermatogenesis	5	2.17391	0.0493473	55815, 54937, 64847, 8382, 9825
GOTERM_BP_FAT	GO:0001570~vasculogenesis	3	1.30435	0.0881351	9444, 7422, 4915	165	41	13528	5.99911	1	0.880034	78.1389
